# Supplementary material for: Polystyrene supported N-phenylpiperazine–Cu(ii) complex: an efficient and reusable catalyst for KA2-coupling reactions under solvent-free conditions
Source: Royal Society of Chemistry journal article supplement (doi:10.1039/c5nj03272e), 2016-01-01

## SUPPORTING INFORMATION

### **Polystyrene supported N-phenylpiperazine-Cu(II) complex: An efficient and reusable catalyst for KA<sup>2</sup>-coupling reaction under solvent-free conditions**

Pullaiah C. Perumgani,<sup>a</sup> Srinivas Keesara,<sup>\*b</sup> Saiprathima Parvathaneni,<sup>a</sup> and Mohan Rao Mandapati<sup>\*a</sup>

<sup>a</sup>*Indian Institute of Chemical Technology, Hyderabad-500607, India*

<sup>b</sup>*School of Chemistry, University of Hyderabad, Hyderabad-500046, India*

*\*Corresponding author. Tel.: +91-40-27193181; Fax: +91-40-27160921*

Received: ....., **E-mail:** [mandapati@iict.res.in](mailto:mandapati@iict.res.in),  
[drsrinivaskeesara@yahoo.com](mailto:drsrinivaskeesara@yahoo.com)

#### **Table of contents**

|                              |              |
|------------------------------|--------------|
| • <b>General Information</b> | <b>SI-2</b>  |
| • <b>Analytical Data</b>     | <b>SI-3</b>  |
| • <b>IR spectra</b>          | <b>SI-11</b> |
| • <b>Spectra</b>             | <b>SI-12</b> |

- **General Information**

All reagents were commercial grade materials and were used without further purification. All solvents were dried and distilled by standard methods. Purification of products was carried out by column chromatography using commercial column chromatography grade silica gel (60-120 mesh) using mixture of ethyl acetate and hexane as eluting agent. All known compounds were characterized and compared with the literature reports. The  $^1\text{H}$  NMR and  $^{13}\text{C}$  NMR spectra were obtained as solutions in  $\text{CDCl}_3$  and TMS as the internal standard. IR spectra were obtained using KBr pallets. ESI-MS spectra were determined on a LCQ ion trap mass spectrometer equipped with an ESI source.

• **Analytical Data**

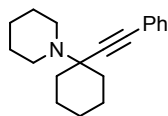

**1-(1-(phenylethynyl)cyclohexyl)piperidine (8a):** yellow solid, mp 51-54 °C. <sup>1</sup>H NMR (400 MHz, CDCl<sub>3</sub>, TMS) δ 7.45-7.43 (m, 2H), 7.31-7.25 (m, 3H), 2.67 (s, 4H), 2.10 (d, *J* = 12.51 Hz, 2H), 1.74-1.71 (m, 2H), 1.63-1.58 (m, 7H), 1.52-1.44 (m, 4H), 1.25-1.23 (m, 1H); <sup>13</sup>C NMR (100 MHz, CDCl<sub>3</sub>) δ 131.6, 128.0, 127.5, 123.6, 90.6, 86.0, 59.2, 47.0, 35.6, 26.5, 25.6, 24.6, 23.0; ESI-MS: (M+H) = 268.

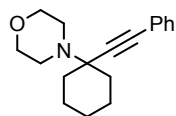

**4-(1-(phenylethynyl)cyclohexyl)morpholine (8b):** pale yellow solid, mp 93-95 °C. <sup>1</sup>H NMR (400 MHz, CDCl<sub>3</sub>, TMS) δ 7.45-7.43 (m, 2H), 7.30-7.28 (m, 3H), 3.77 (d, *J* = 4.73 Hz, 4H), 2.73 (d, *J* = 4.57 Hz, 4H), 2.05 (m, 2H), 1.75-1.72 (m, 2H), 1.64-1.61 (m, 2H), 1.52-1.46 (m, 2H), 1.25 (m, 2H); <sup>13</sup>C NMR (100 MHz, CDCl<sub>3</sub>) δ 131.6, 128.1, 127.7, 123.3, 89.6, 86.5, 67.4, 58.9, 46.6, 35.3, 25.6, 22.7; ESI-MS: (M+H) = 270.

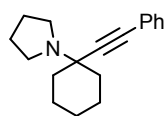

**1-(1-(phenylethynyl)cyclohexyl)pyrrolidine (8f):** yellow liquid. <sup>1</sup>H NMR (400 MHz, CDCl<sub>3</sub>, TMS) δ 7.44-7.42 (m, 2H), 7.30-7.26 (m, 3H), 2.80 (t, *J* = 6.71 Hz, 4H), 2.04 (d, *J* = 11.74 Hz, 2H), 1.80-1.78 (m, 4H), 1.71-1.61 (m, 6H), 1.56-1.50 (m, 2H); <sup>13</sup>C NMR (100 MHz, CDCl<sub>3</sub>) δ 131.6, 128.0, 127.5, 123.5, 90.2, 86.0, 59.2, 46.9, 37.7, 25.6, 23.4, 22.9; ESI-MS: (M+H) = 254.

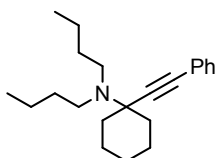

**N,N-dibutyl-1-(phenylethynyl)cyclohexanamine (8g):** yellow liquid.  $^1\text{H}$  NMR (400 MHz,  $\text{CDCl}_3$ , TMS)  $\delta$  7.42-7.40 (m, 2H), 7.30-7.25 (m, 3H), 2.64 (t,  $J = 8.06$  Hz, 4H), 2.05 (d,  $J = 11.86$  Hz, 2H) 1.69-1.59 (m, 4H), 1.54-1.44 (m, 6H), 1.33-1.24 (m, 6H), 0.92 (t,  $J = 7.33$  Hz, 6H);  $^{13}\text{C}$  NMR (100 MHz,  $\text{CDCl}_3$ )  $\delta$  131.5, 128.1, 127.4, 124.0, 93.0, 84.8, 59.6, 50.0, 37.1, 32.2, 25.7, 23.2, 20.7, 14.1; ESI-MS: (M+H) = 312.

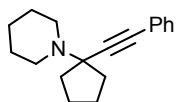

**1-(1-(phenylethynyl)cyclopentyl)piperidine (9a):** yellow liquid.  $^1\text{H}$  NMR (400 MHz,  $\text{CDCl}_3$ , TMS)  $\delta$  7.43-7.41 (m, 2H), 7.30-7.25 (m, 3H), 2.65 (s, 4H), 2.15-2.11 (m, 2H), 1.90-1.85 (m, 2H), 1.81-1.71 (m, 4H), 1.65-1.60 (m, 4H), 1.45 (s, 2H);  $^{13}\text{C}$  NMR (100 MHz,  $\text{CDCl}_3$ )  $\delta$  131.8, 128.3, 127.8, 124.0, 91.7, 85.3, 67.7, 50.5, 40.1, 26.5, 24.6, 23.6; ESI-MS: (M+H) = 254.

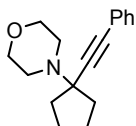

**4-(1-(phenylethynyl)cyclopentyl)morpholine (9b):** yellow solid, mp 78-80 °C.  $^1\text{H}$  NMR (400 MHz,  $\text{CDCl}_3$ , TMS)  $\delta$  7.43-7.41 (m, 2H), 7.31-7.28 (m, 3H), 3.77 (t,  $J = 4.73$  Hz, 4H), 2.72 (t,  $J = 4.88$  Hz, 4H), 2.12-2.08 (m, 2H), 1.91-1.86 (m, 2H), 1.82-1.70 (m, 4H);  $^{13}\text{C}$  NMR (100 MHz,  $\text{CDCl}_3$ )  $\delta$  131.7, 128.2, 127.7, 123.4, 90.4, 85.6, 67.2, 49.5, 39.3, 29.6, 23.2; ESI-MS: (M+H) = 256.

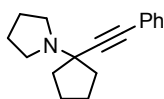

**1-(1-(phenylethynyl)cyclopentyl)pyrrolidine (9f):** yellow liquid.  $^1\text{H}$  NMR (400 MHz,  $\text{CDCl}_3$ , TMS)  $\delta$  7.41-7.39 (m, 2H), 7.30-7.26 (m, 3H), 2.80-2.77 (m, 4H), 2.07-2.05 (m, 2H), 1.88-1.78 (m, 10H);  $^{13}\text{C}$  NMR (100 MHz,  $\text{CDCl}_3$ )  $\delta$  131.5, 128.0, 127.5, 123.5, 91.0, 84.8, 65.5, 49.1, 40.3, 23.5, 23.4; ESI-MS: (M+H) = 240.

**i)**

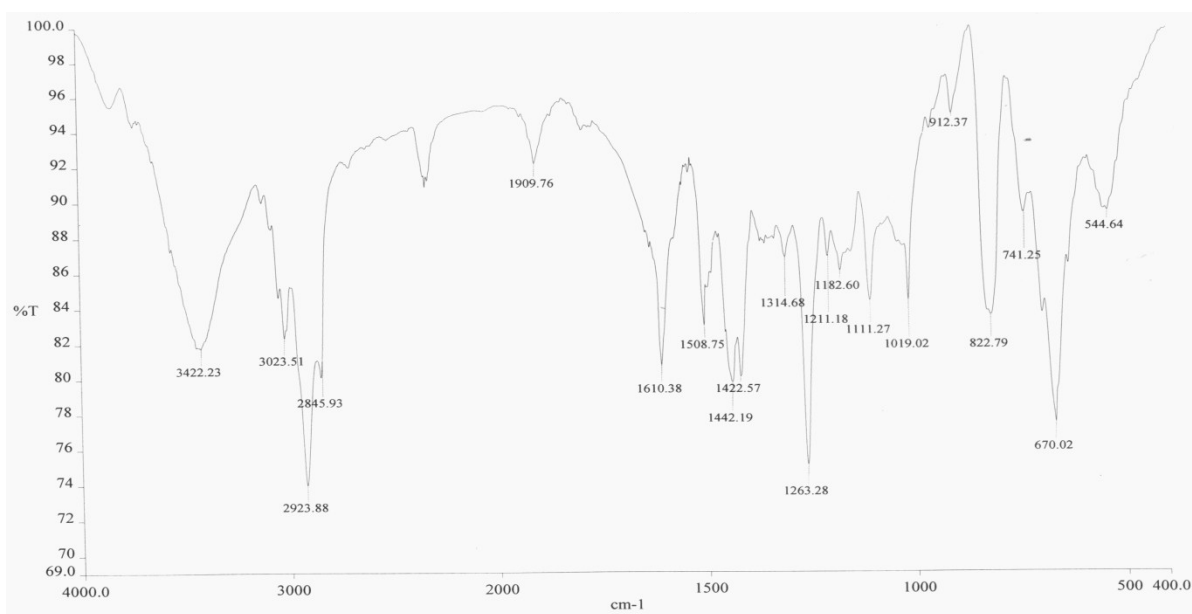

**ii)**

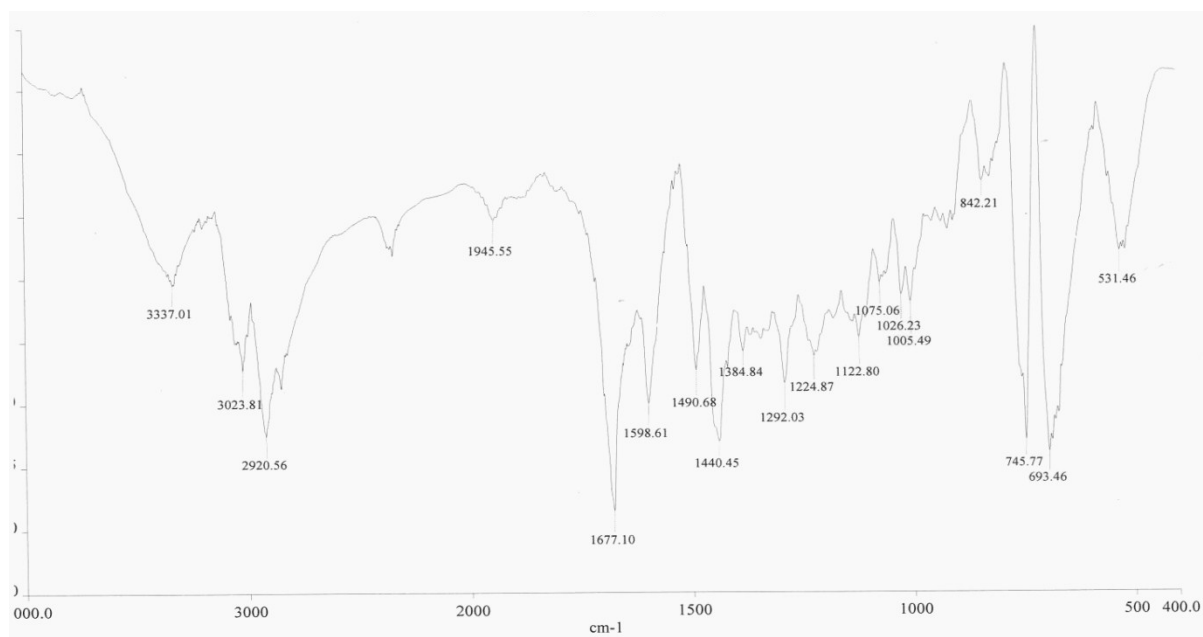

FT-IR spectra of: (i) chloromethylated polystyrene (ii) Polystyrene supported N-phenylpiperazine-Cu(II) complex (**4c**).

**<sup>1</sup>H & <sup>13</sup>C NMR spectrum of 8a**

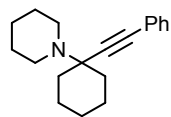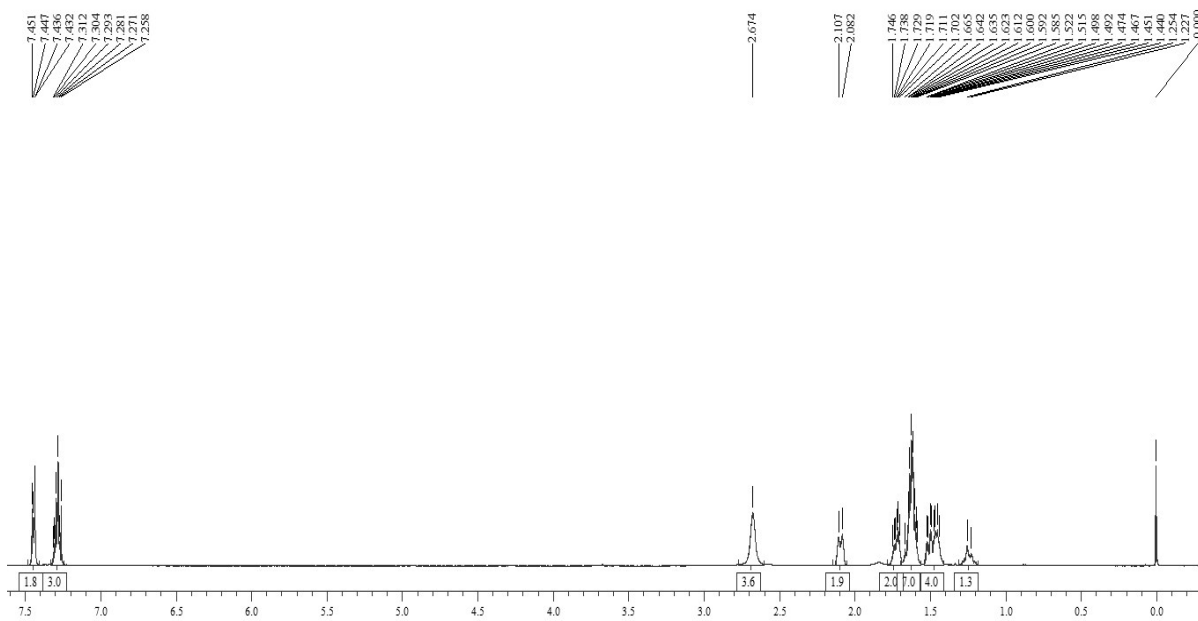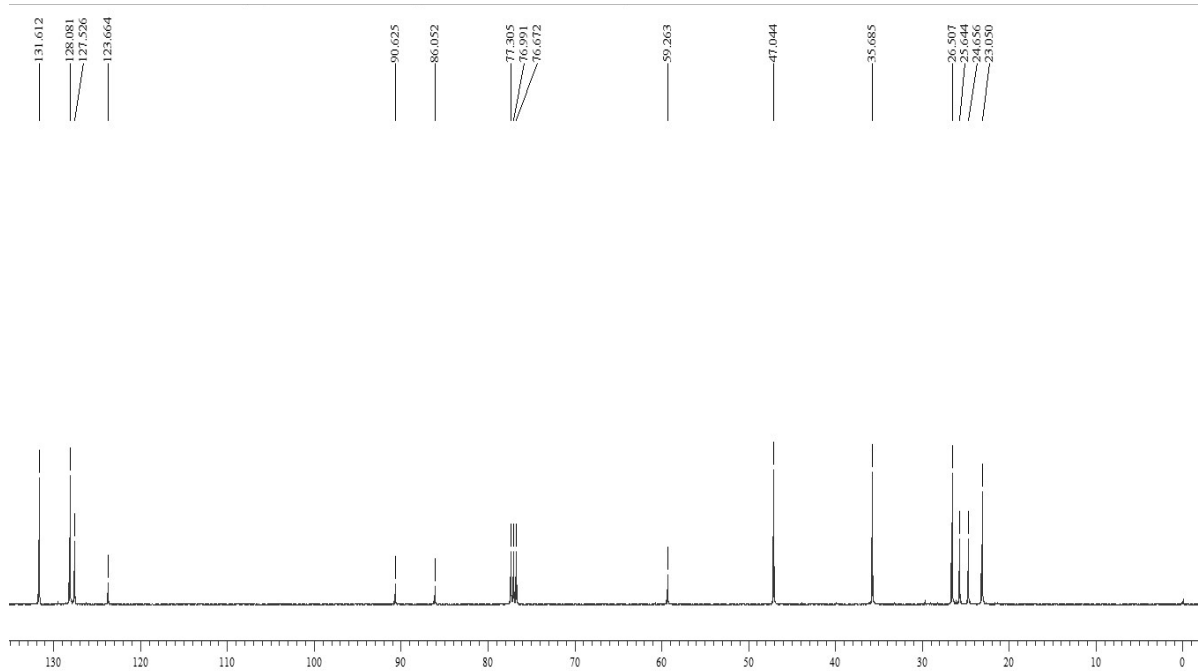

<sup>1</sup>H & <sup>13</sup>C NMR spectrum of 8b

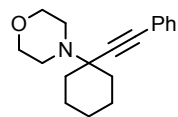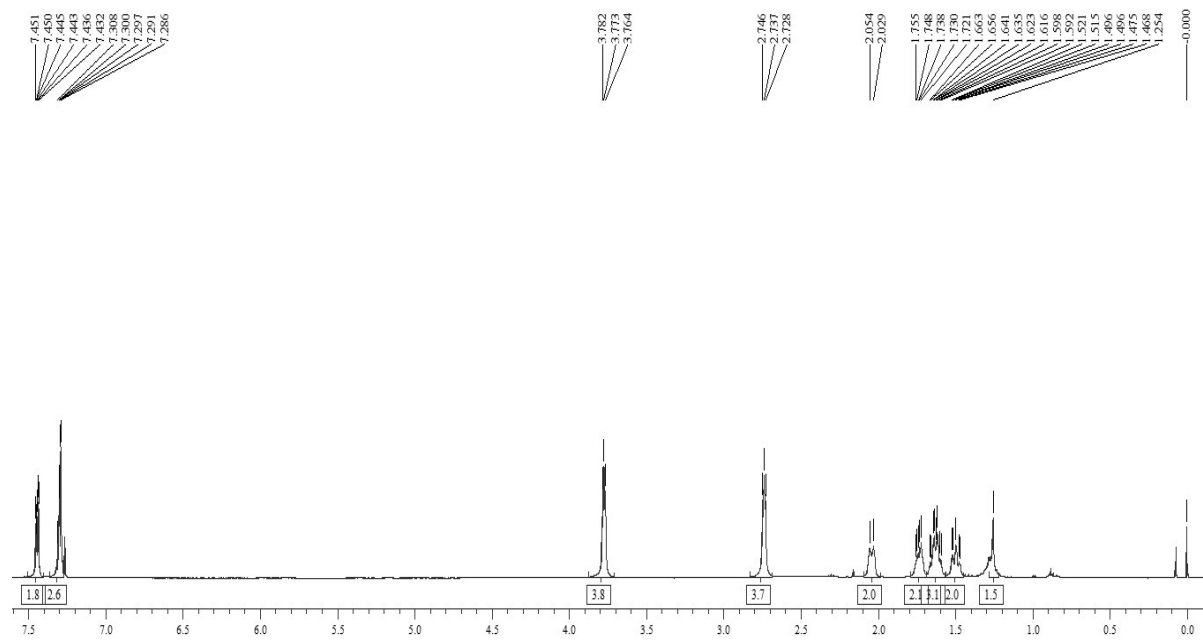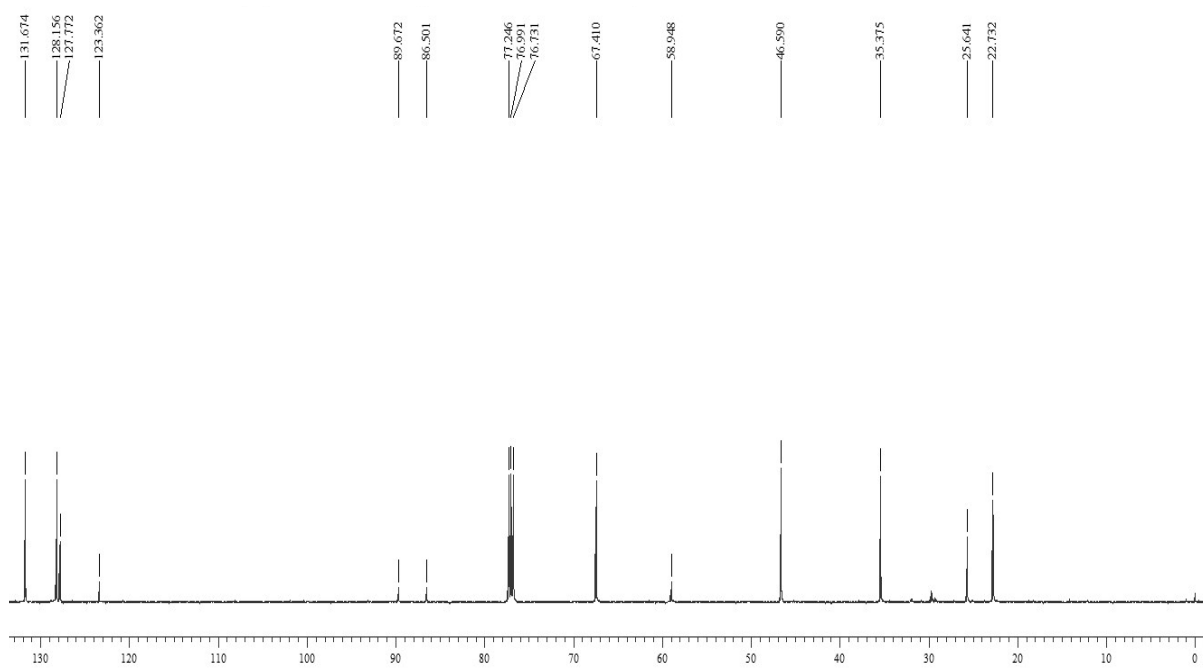



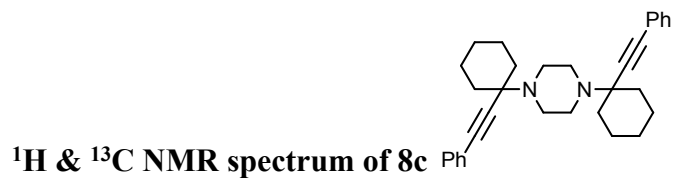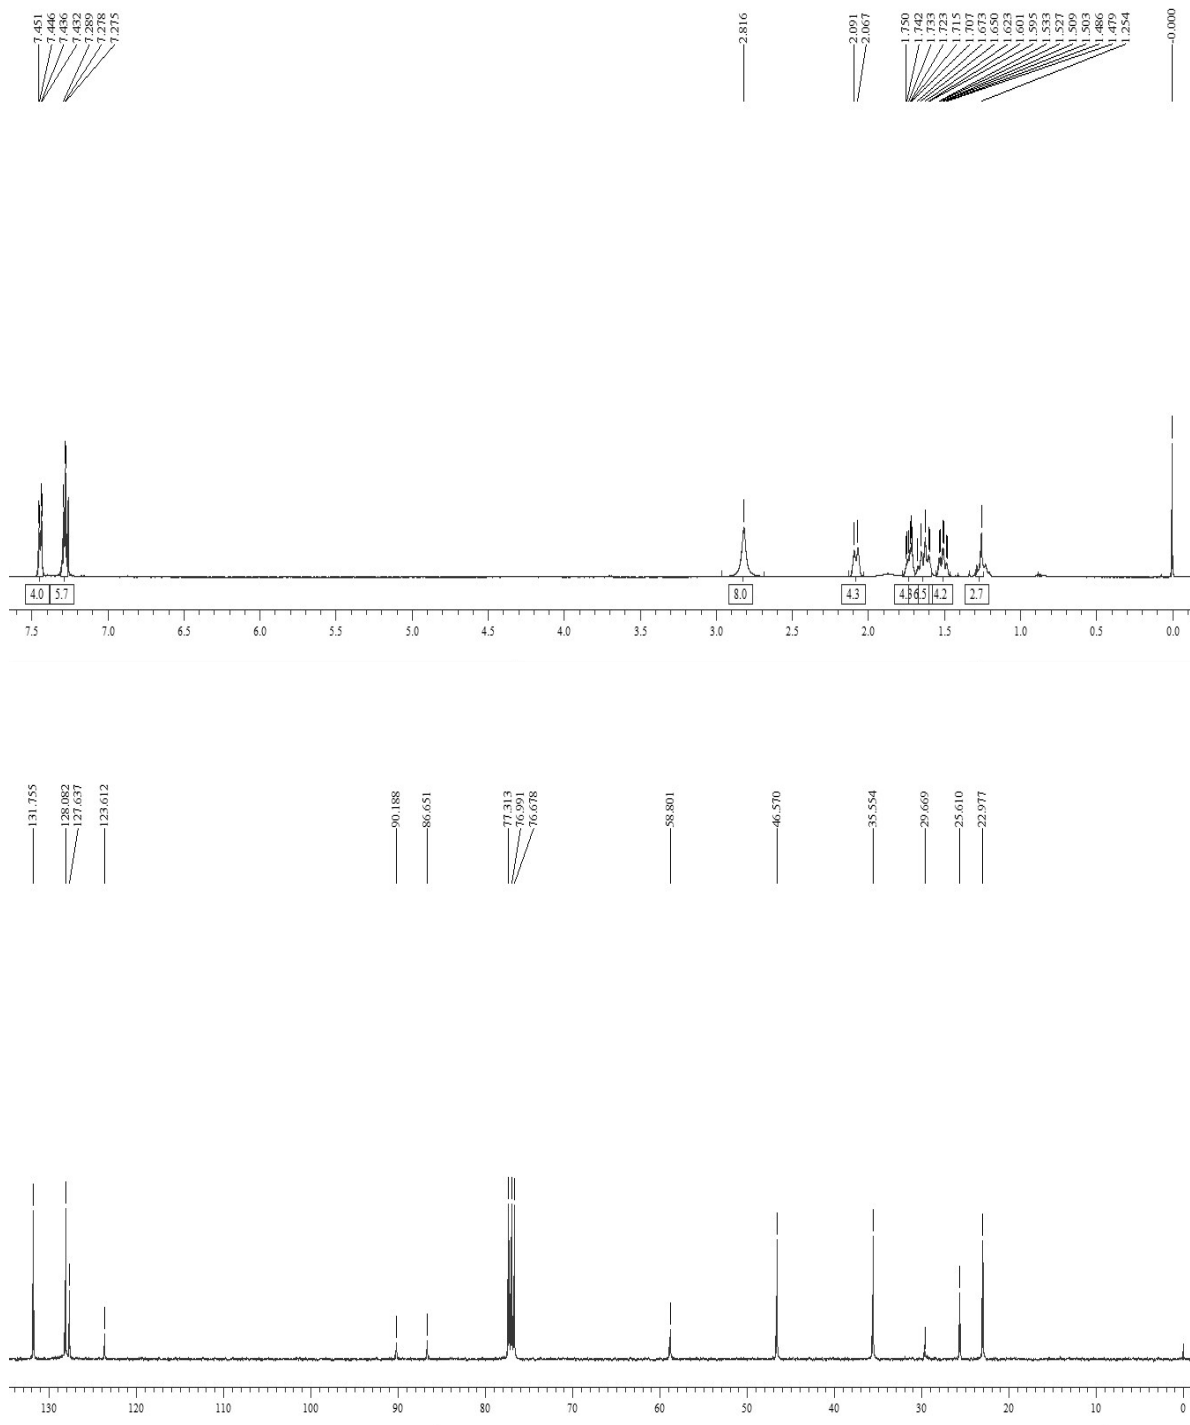

# $^1\text{H}$ & $^{13}\text{C}$ NMR spectrum of 8d

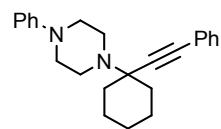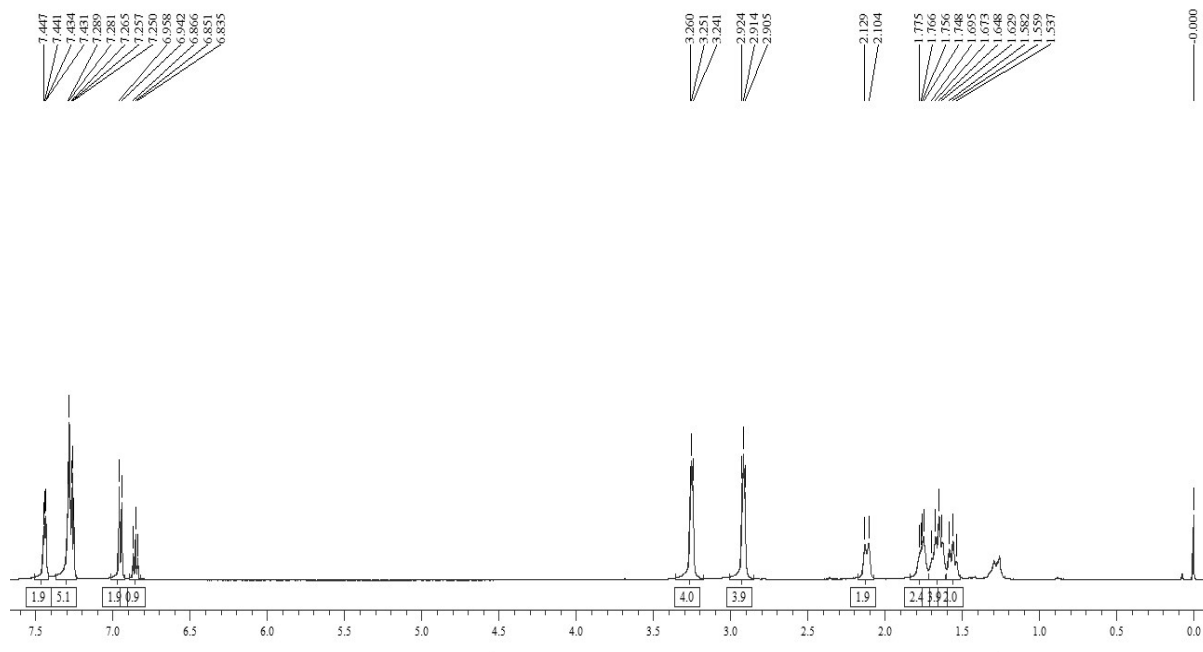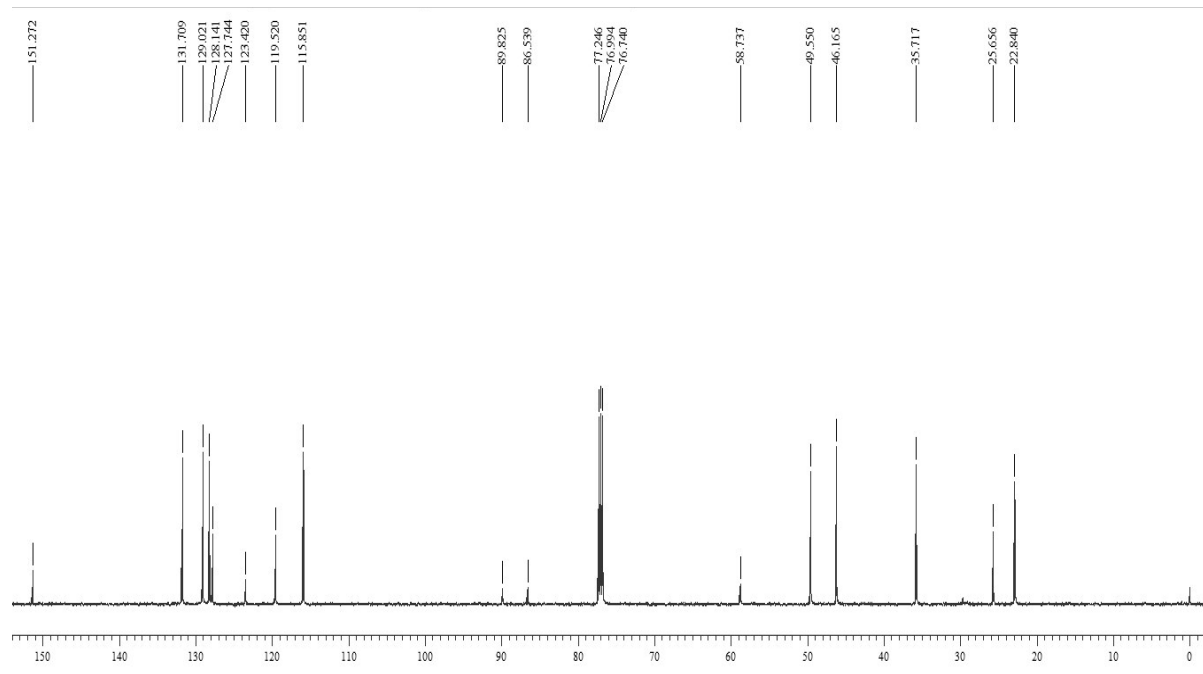

**<sup>1</sup>H & <sup>13</sup>C NMR spectrum of 8e**

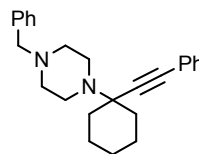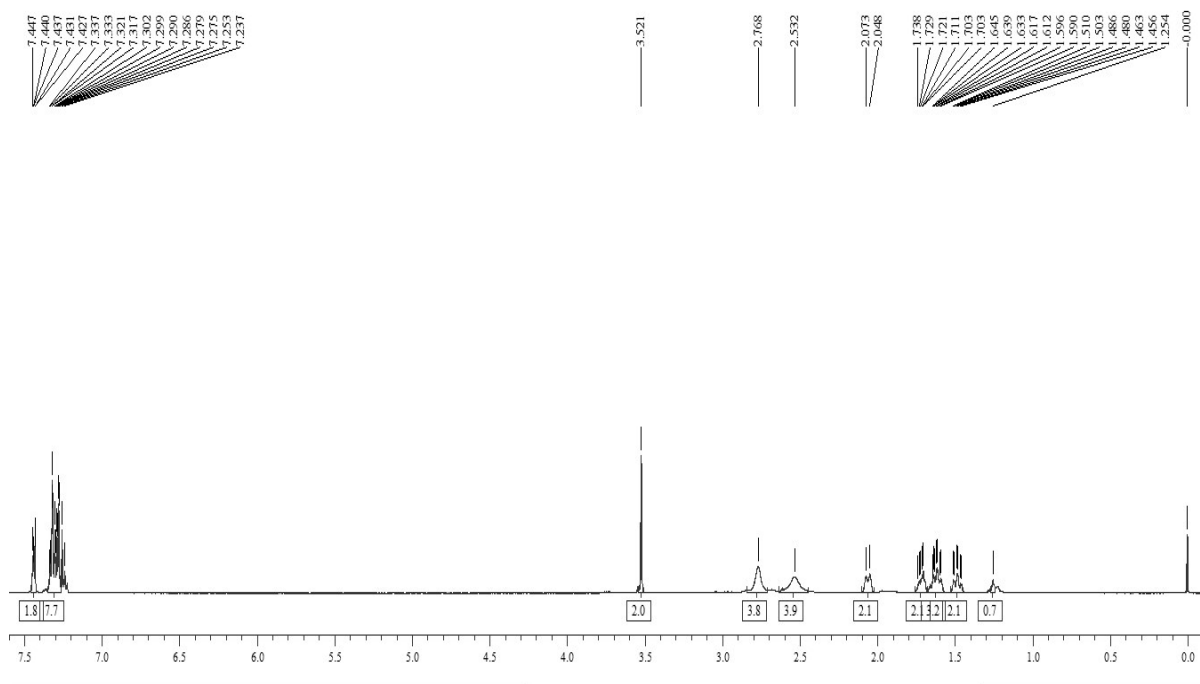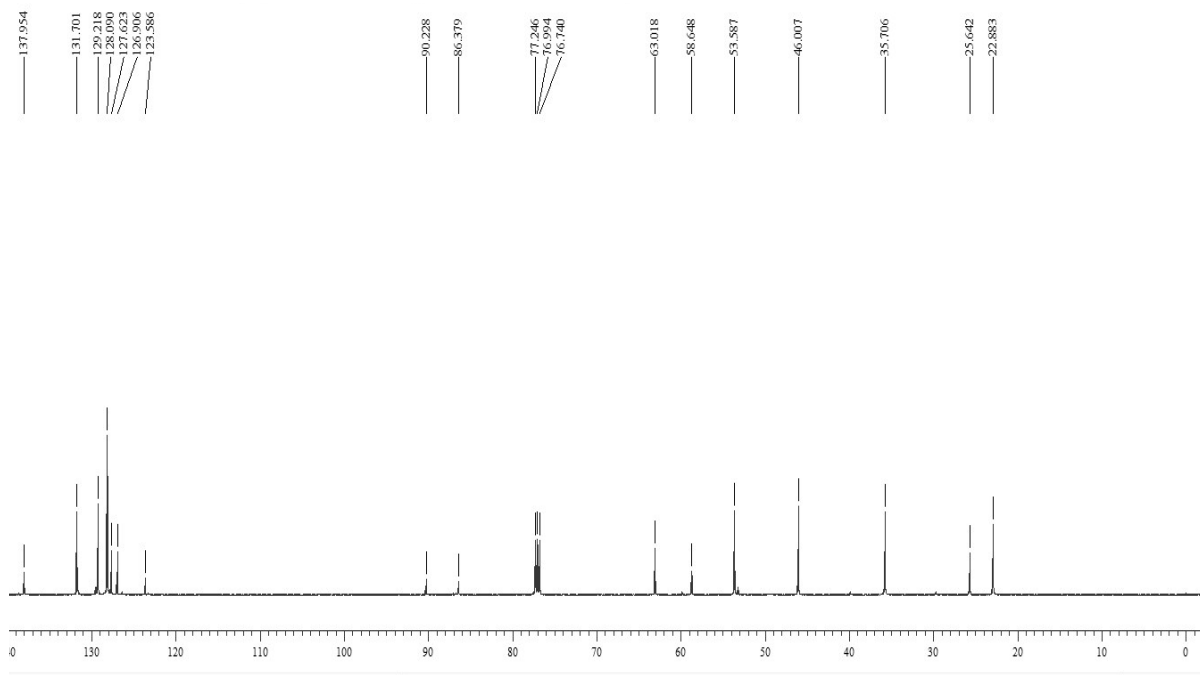

$^1\text{H}$  &  $^{13}\text{C}$  NMR spectrum of 8f

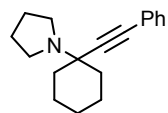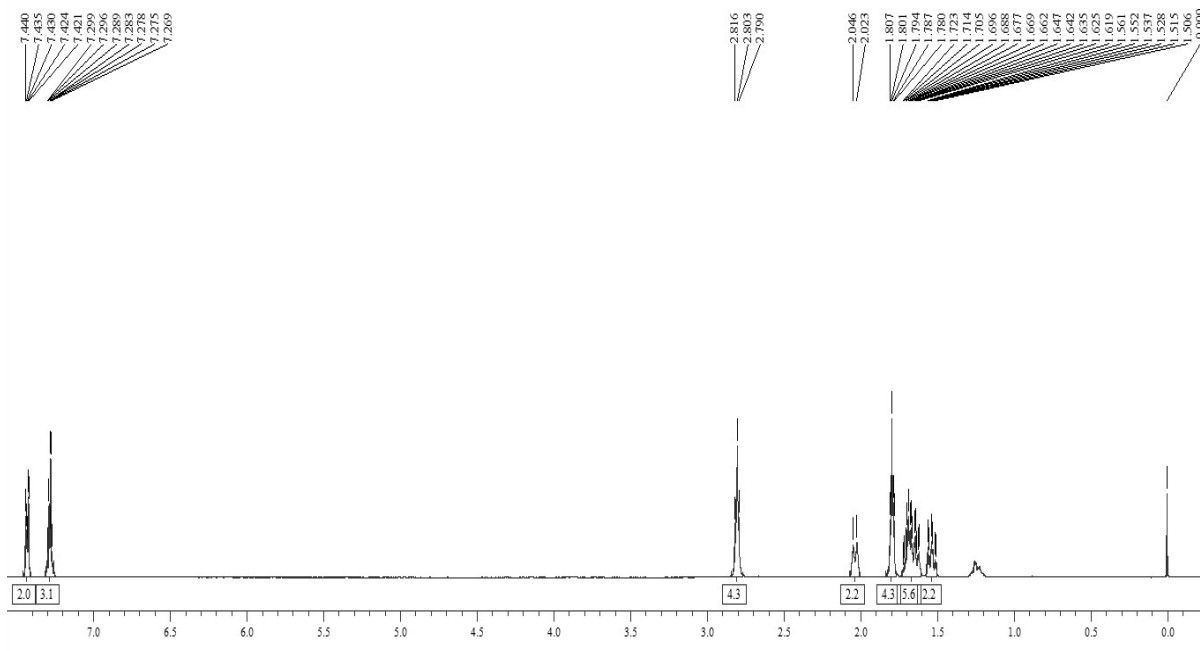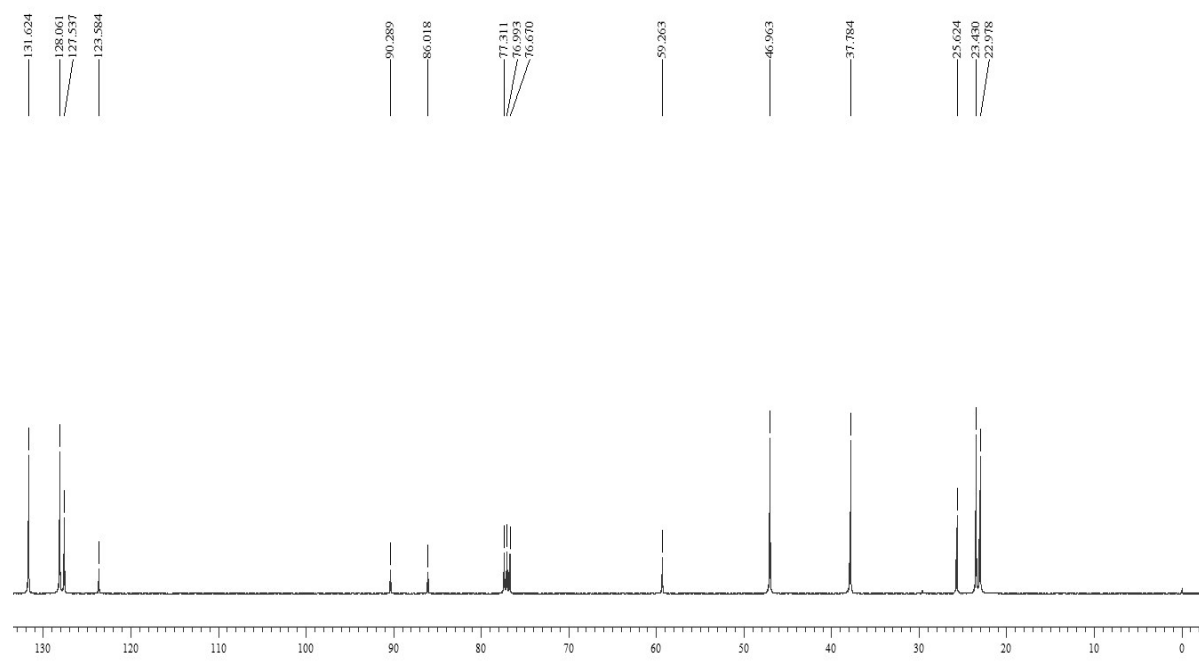

<sup>1</sup>H & <sup>13</sup>C NMR spectrum of 8g

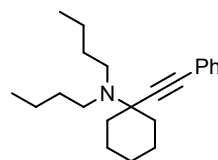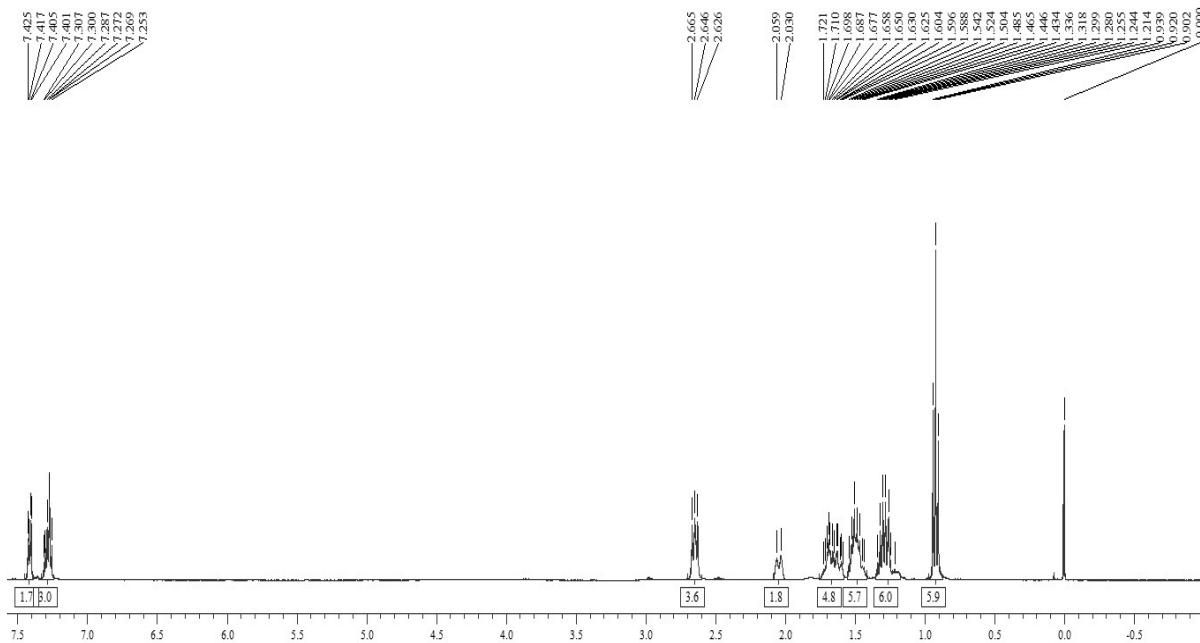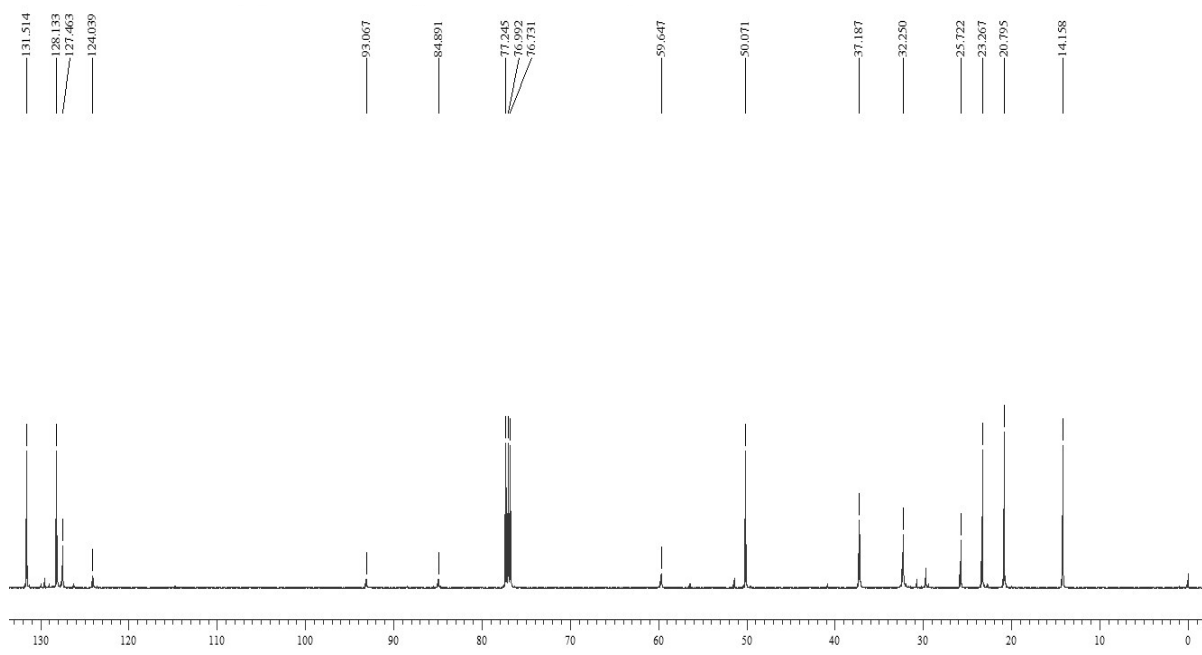

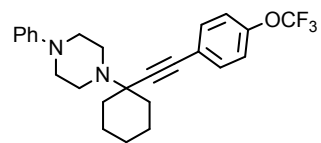

**$^1\text{H}$  &  $^{13}\text{C}$  NMR spectrum of 8h**

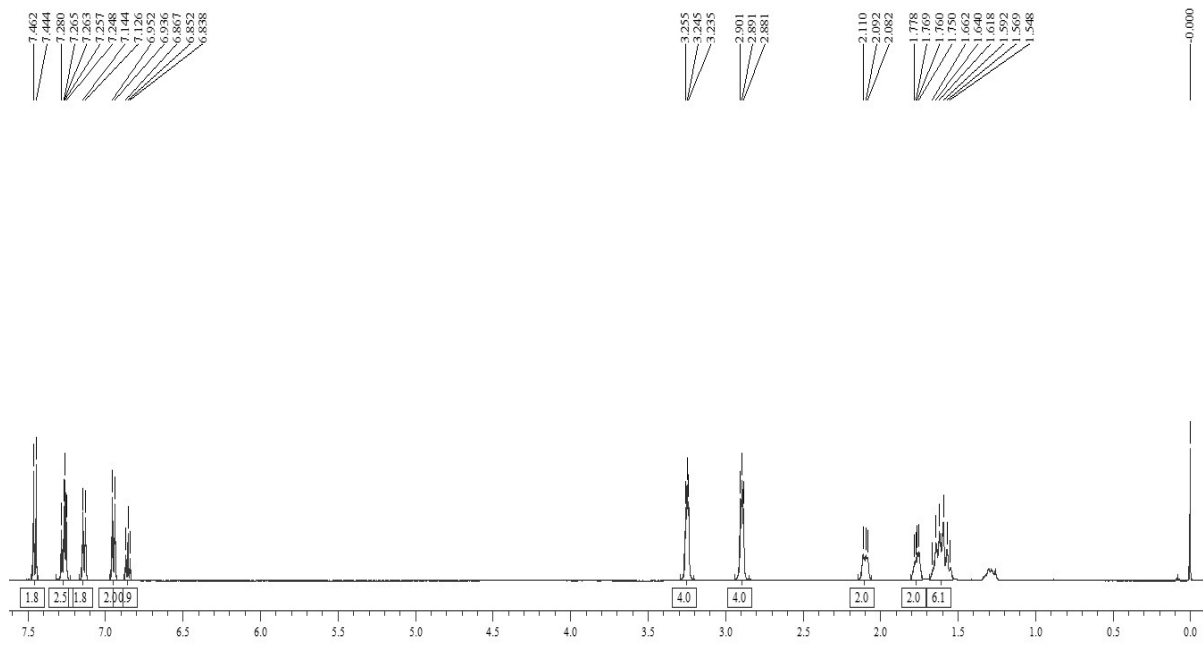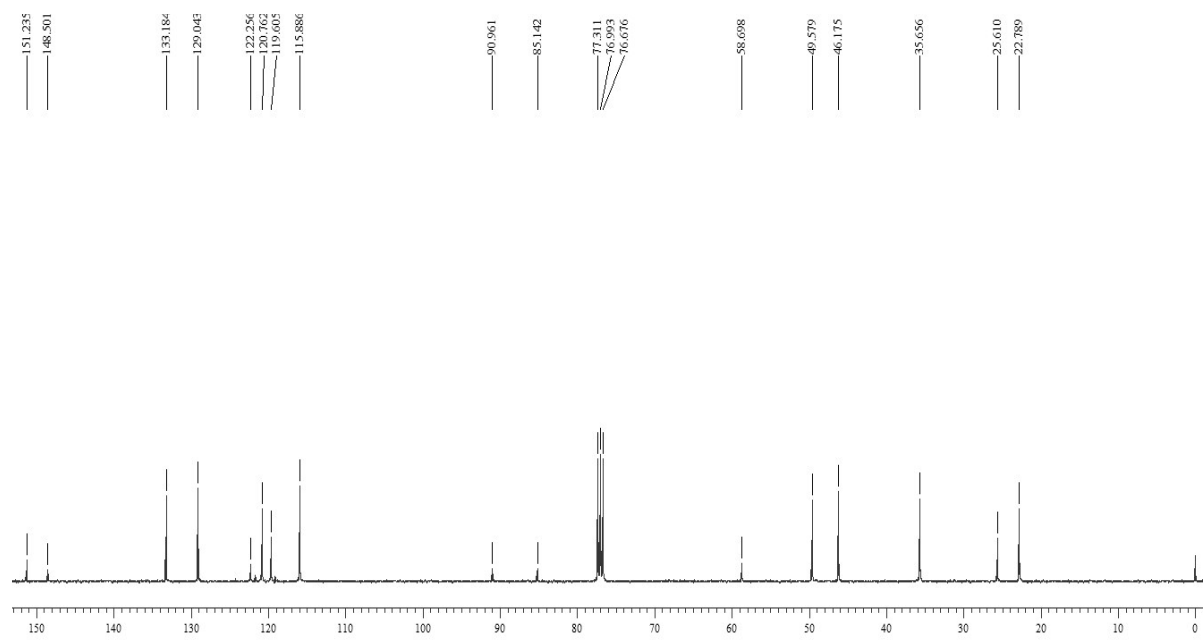

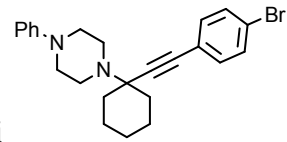

**<sup>1</sup>H & <sup>13</sup>C NMR spectrum of 8i**

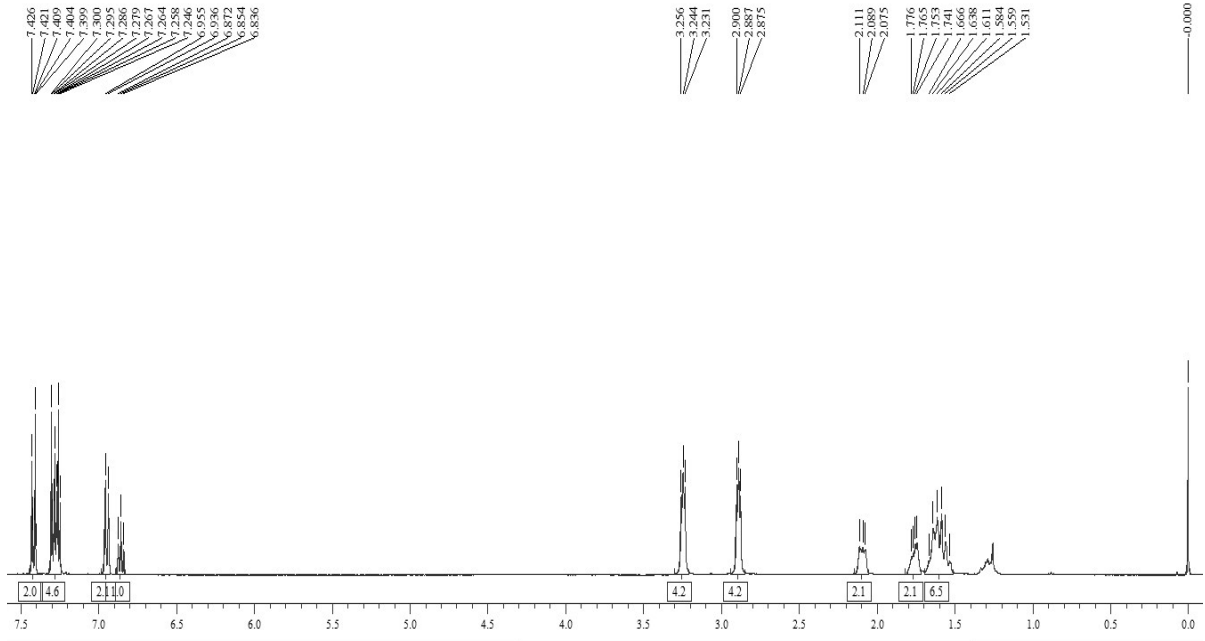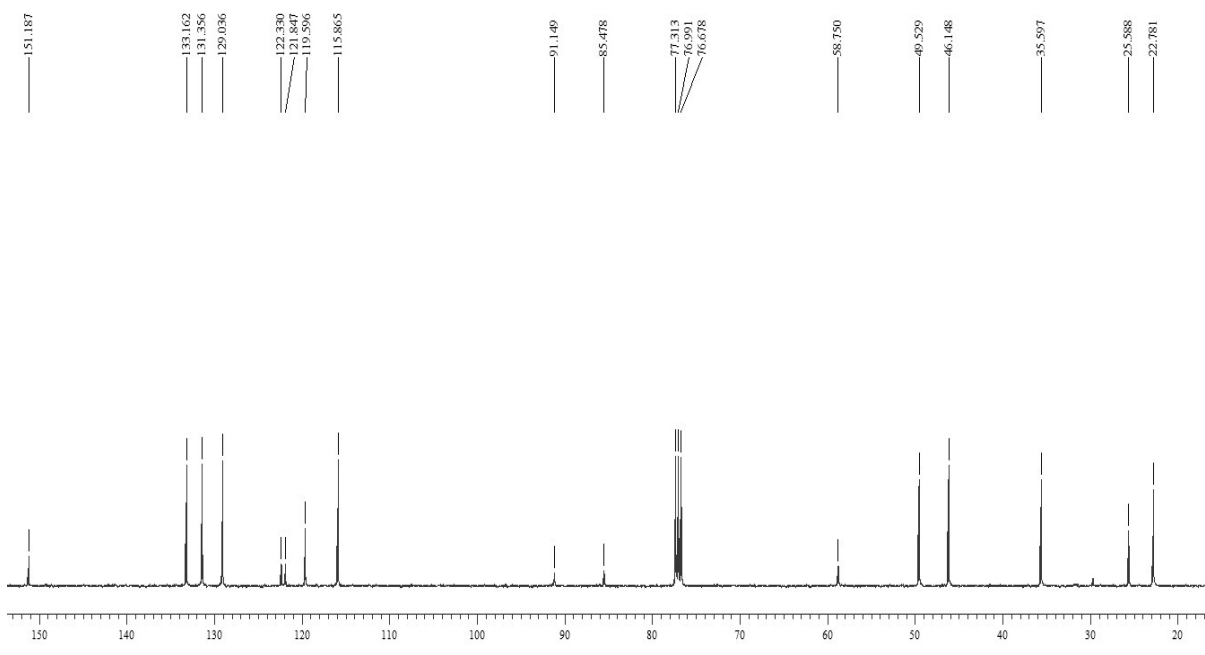

**<sup>1</sup>H & <sup>13</sup>C NMR spectrum of 8j**

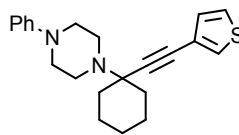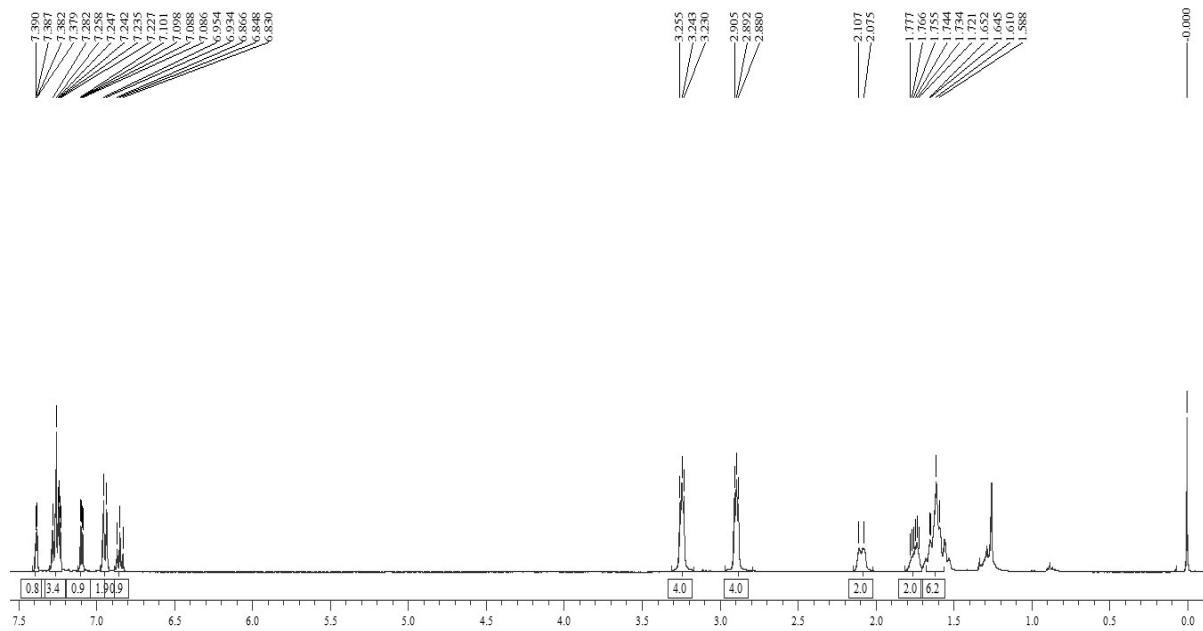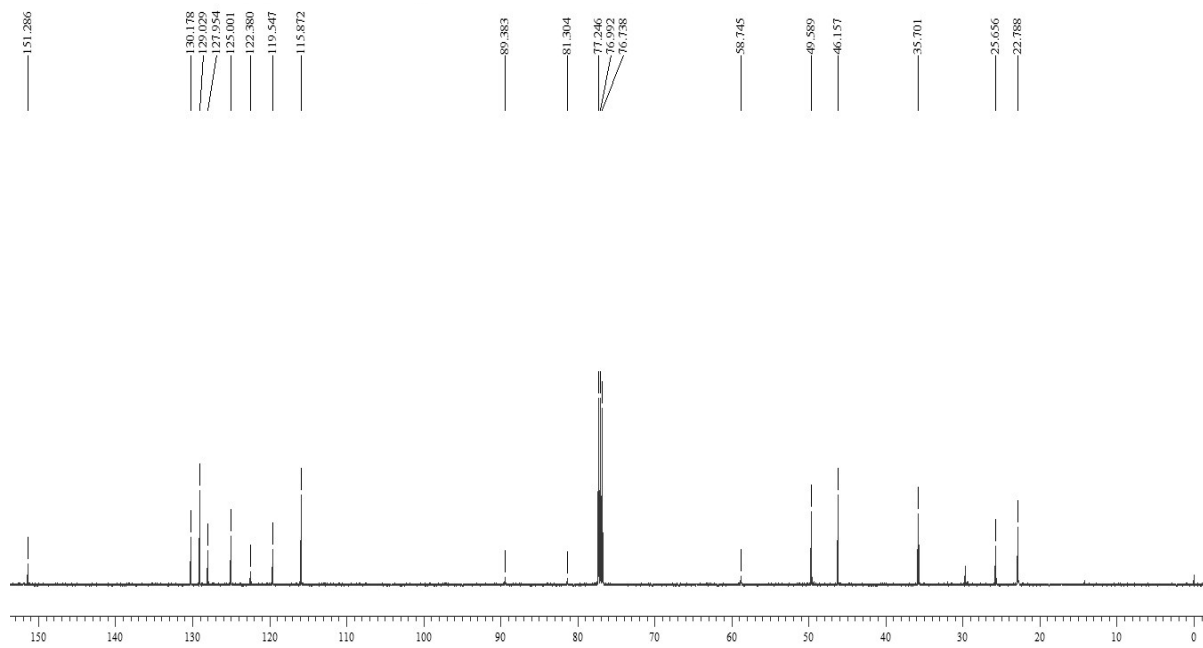



# $^1\text{H}$ & $^{13}\text{C}$ NMR spectrum of 8k

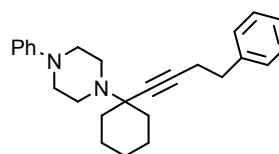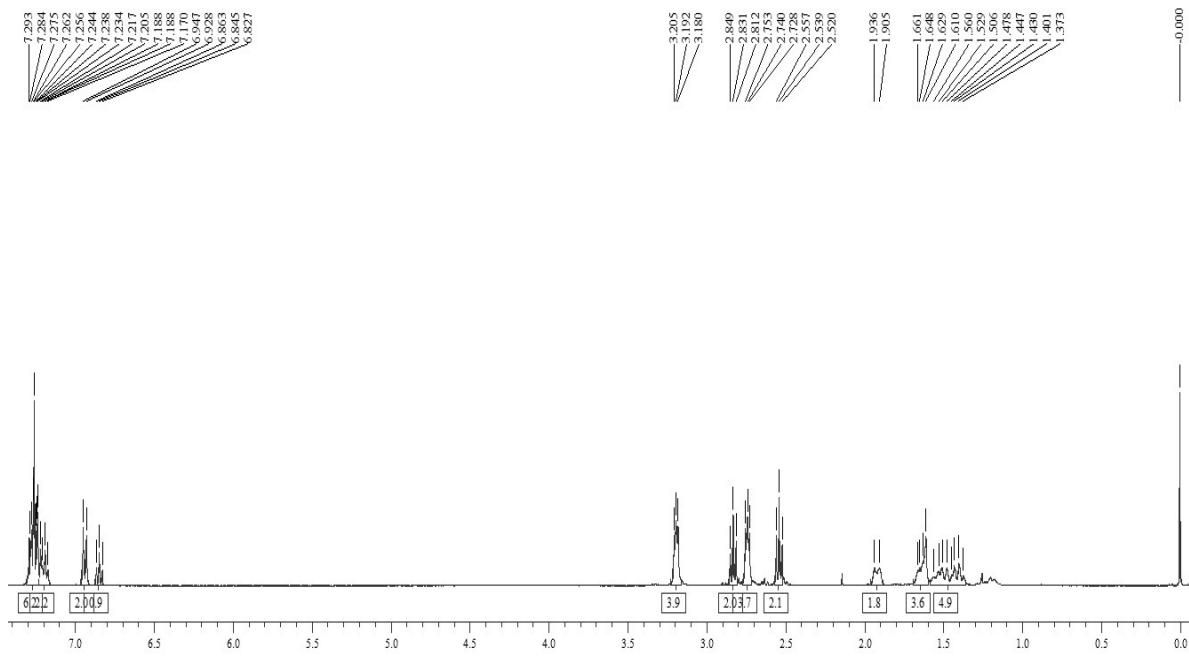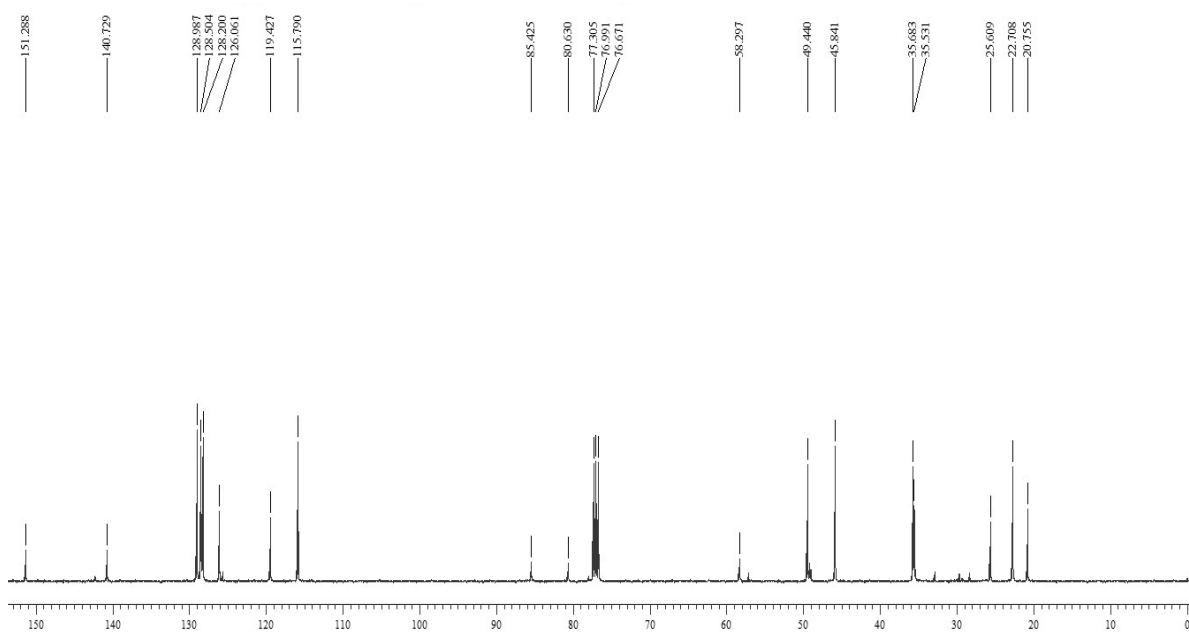

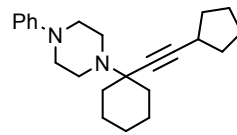

**$^1\text{H}$  &  $^{13}\text{C}$  NMR spectrum of 8l**

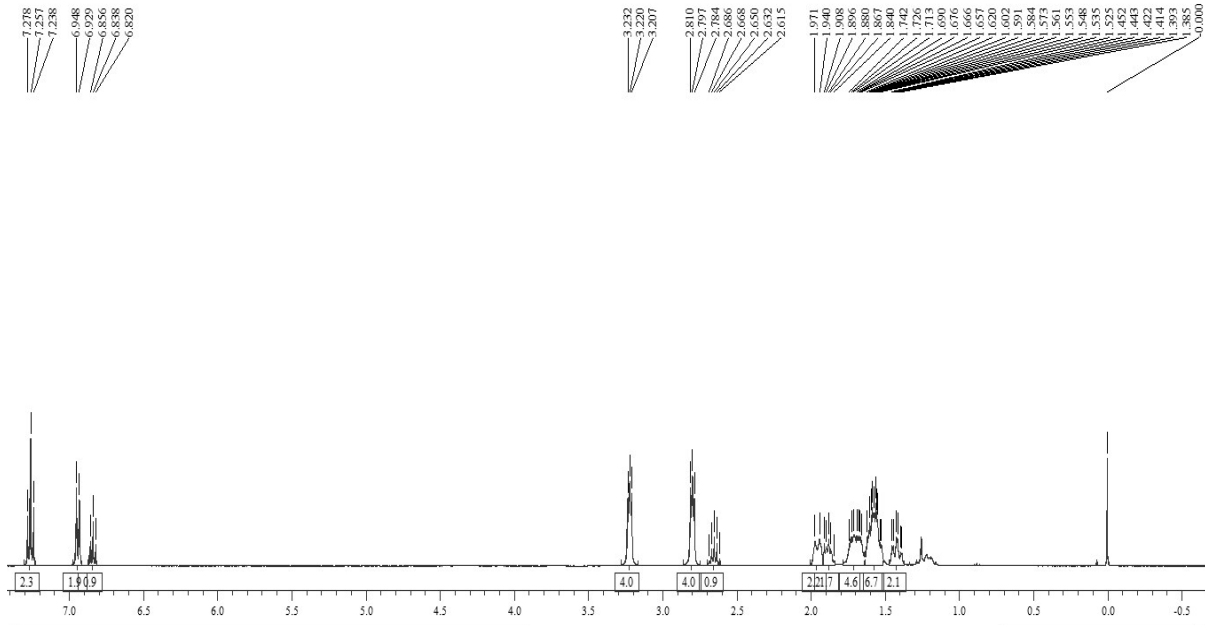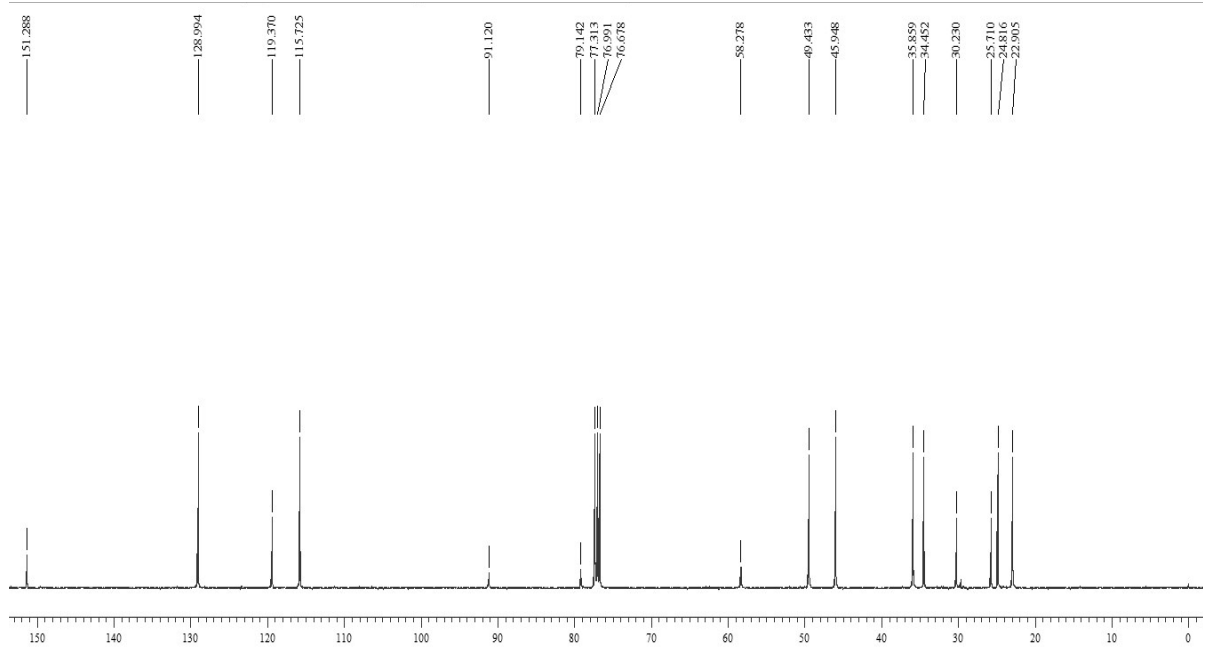

**$^1\text{H}$  &  $^{13}\text{C}$  NMR spectrum of 8m**

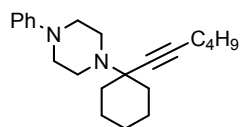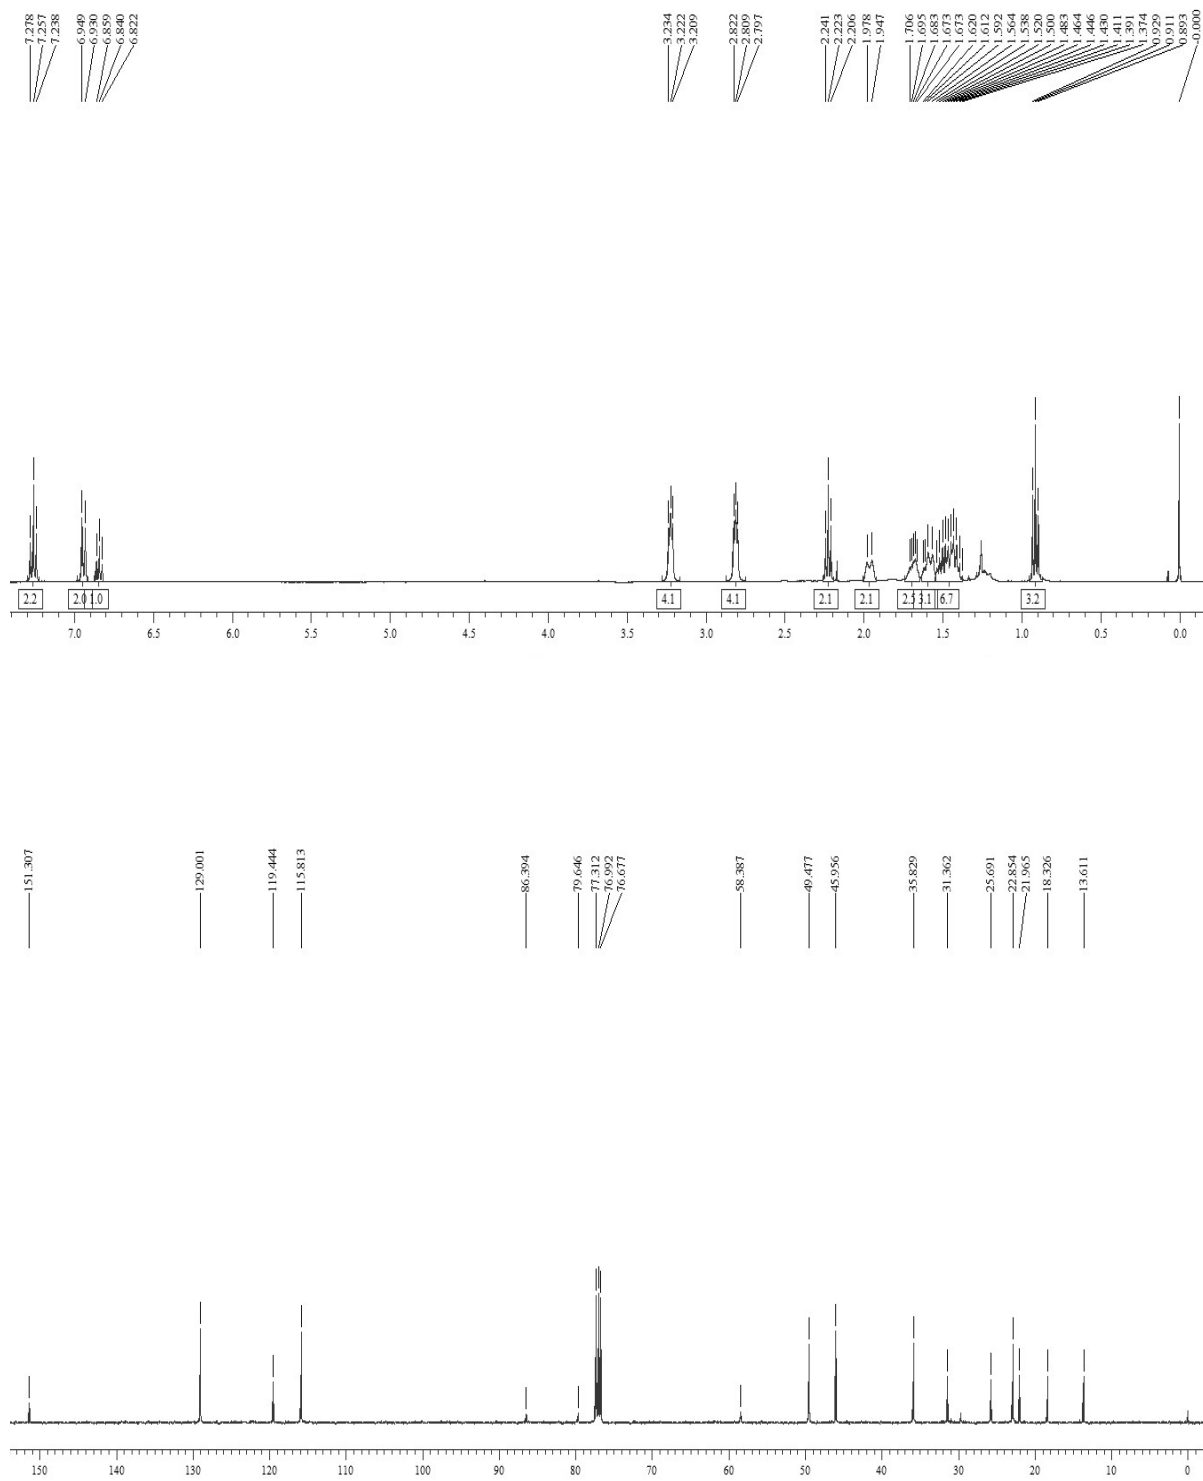

**$^1\text{H}$  &  $^{13}\text{C}$  NMR spectrum of 8n**

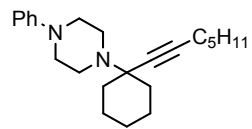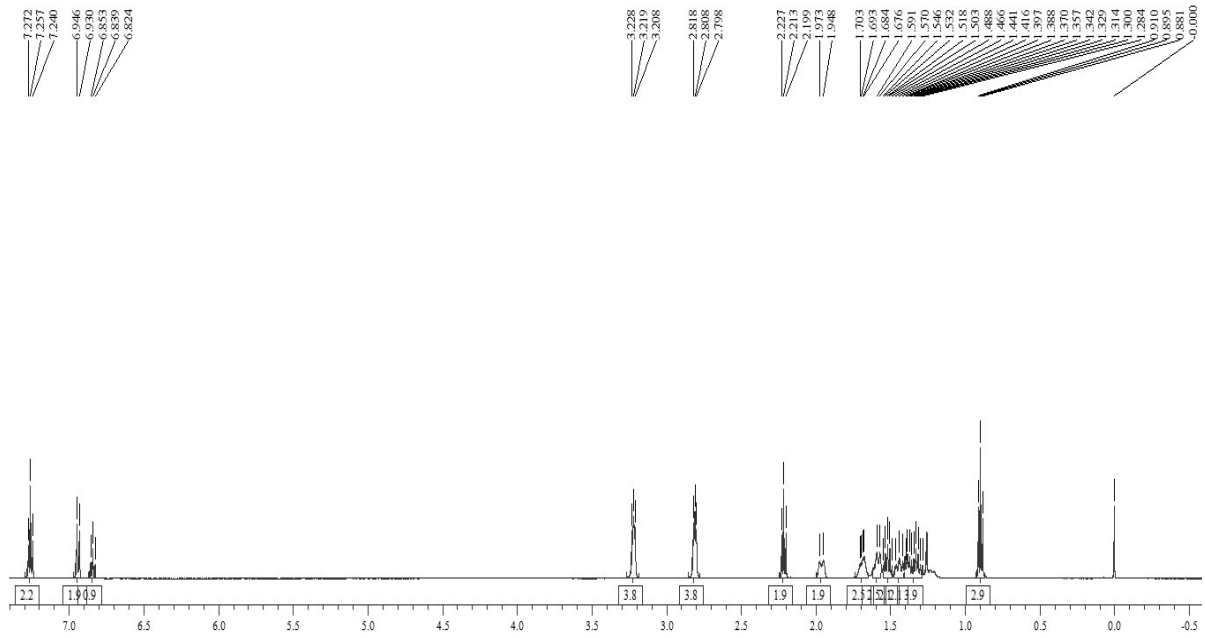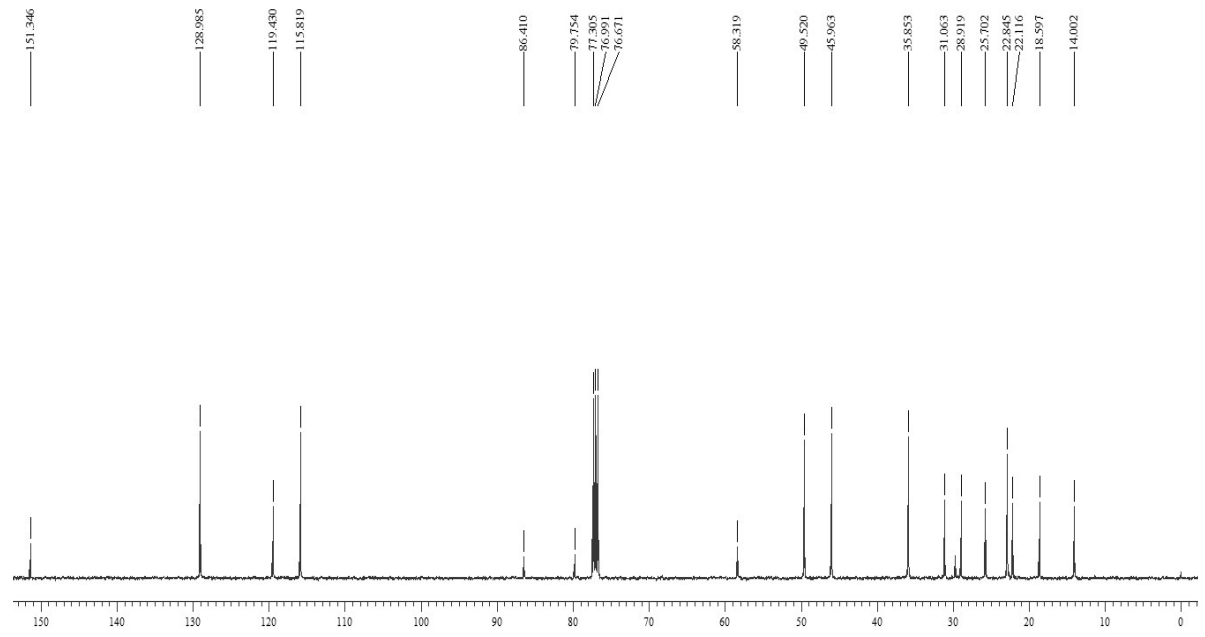

**$^1\text{H}$  &  $^{13}\text{C}$  NMR spectrum of 8o**

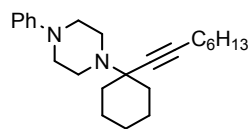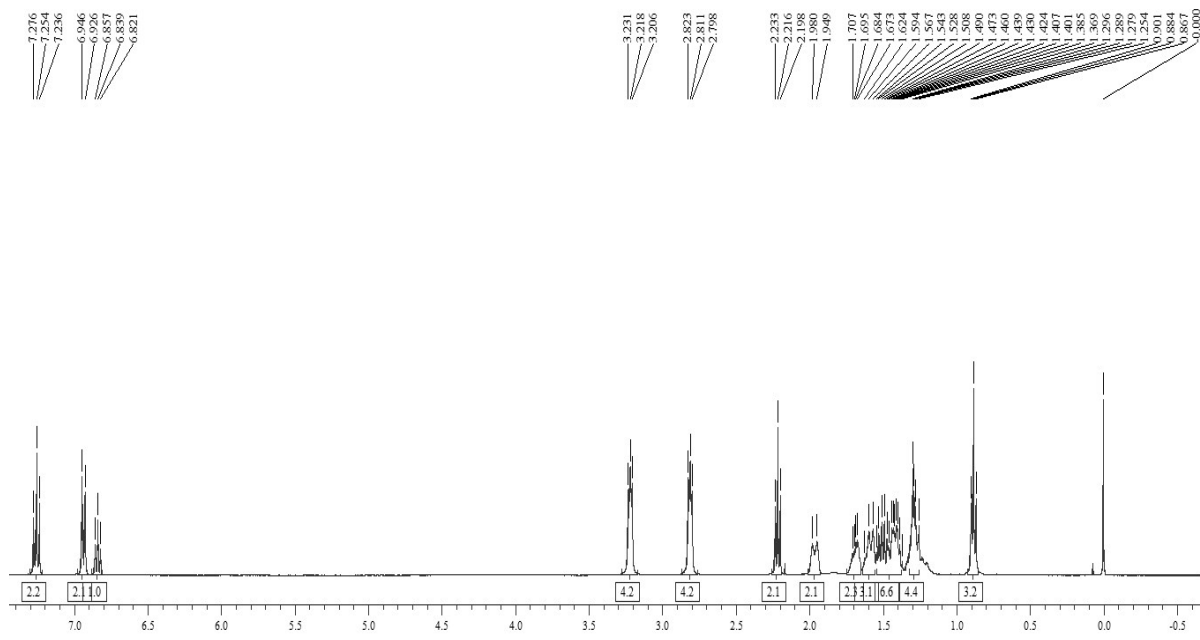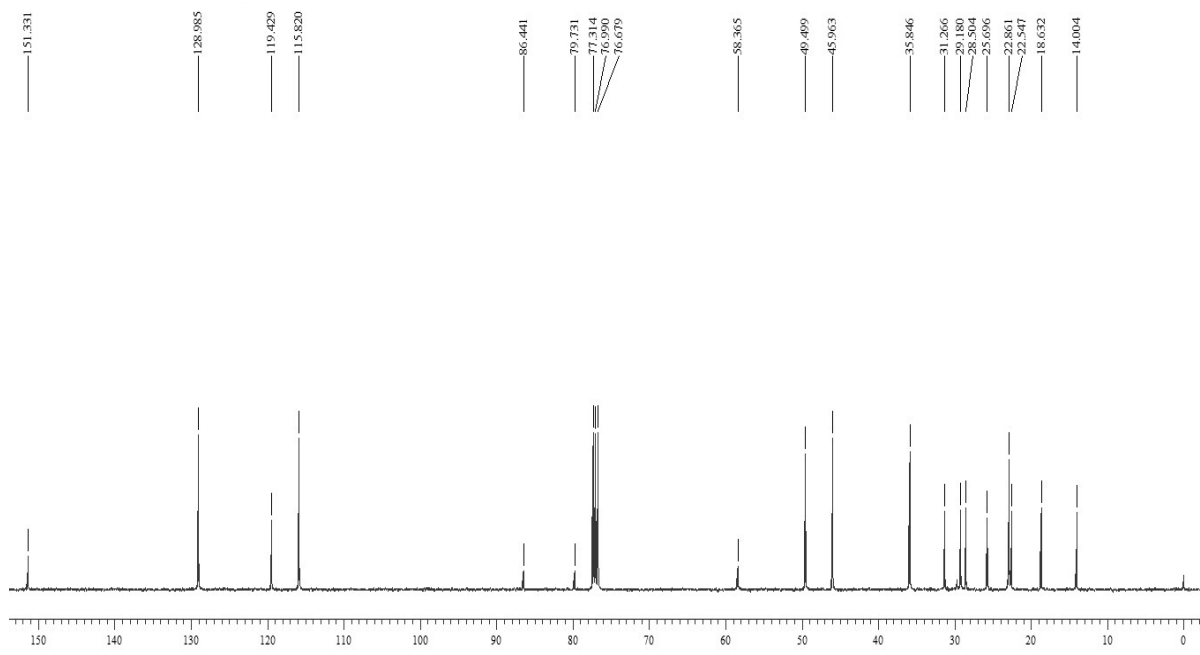

$^1\text{H}$  &  $^{13}\text{C}$  NMR spectrum of 8p

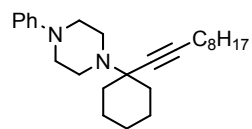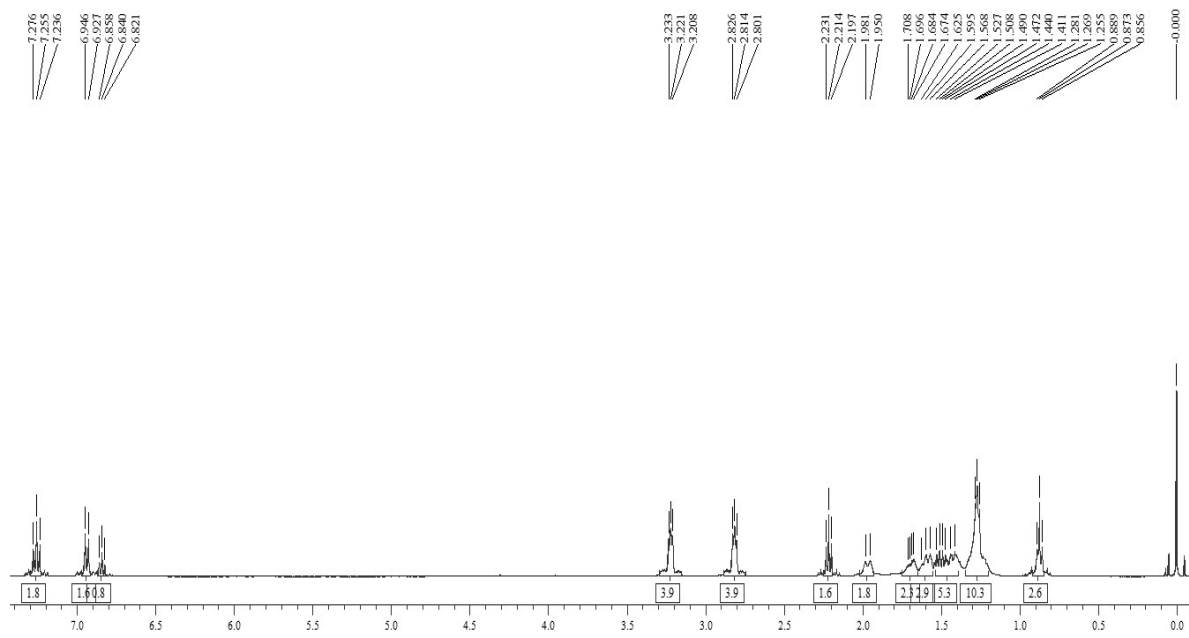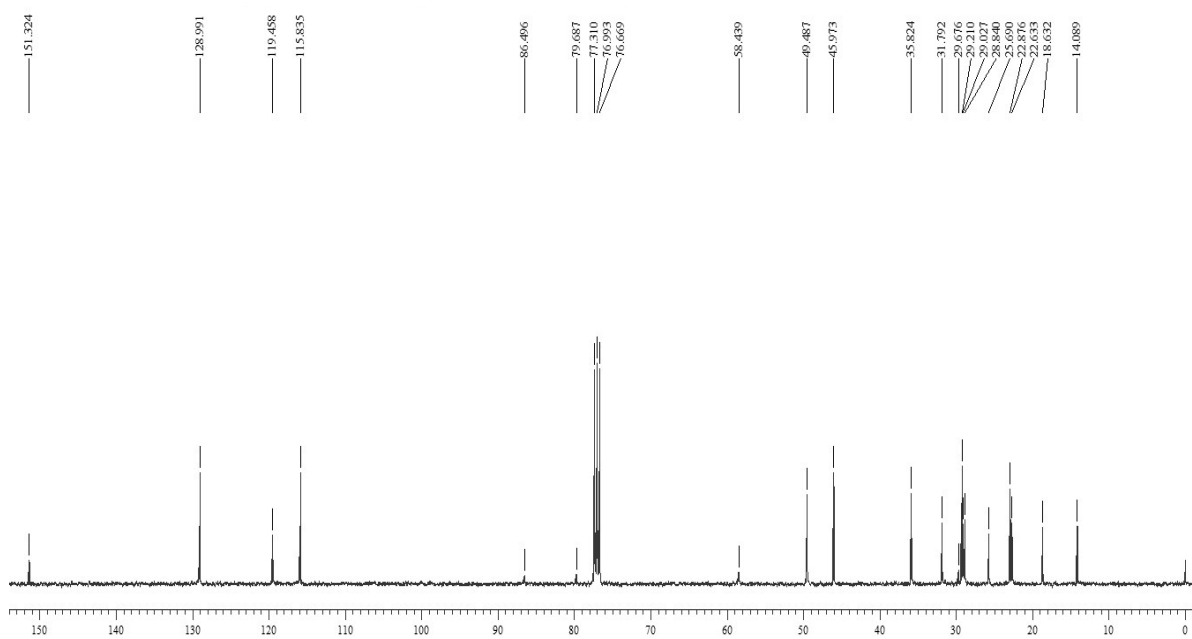

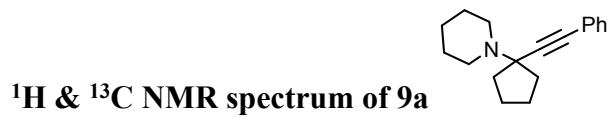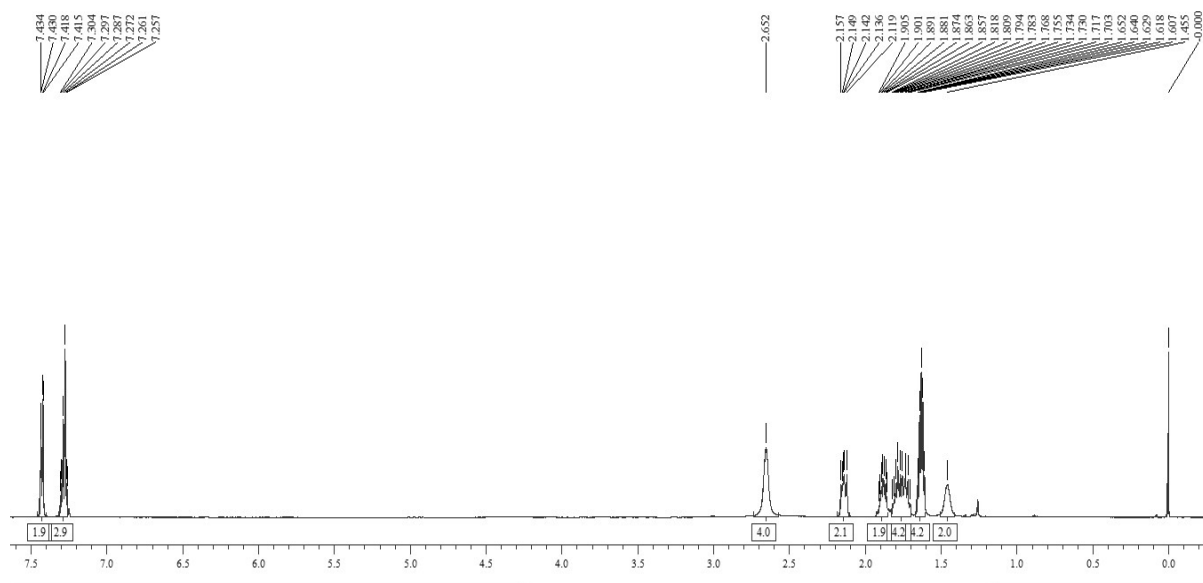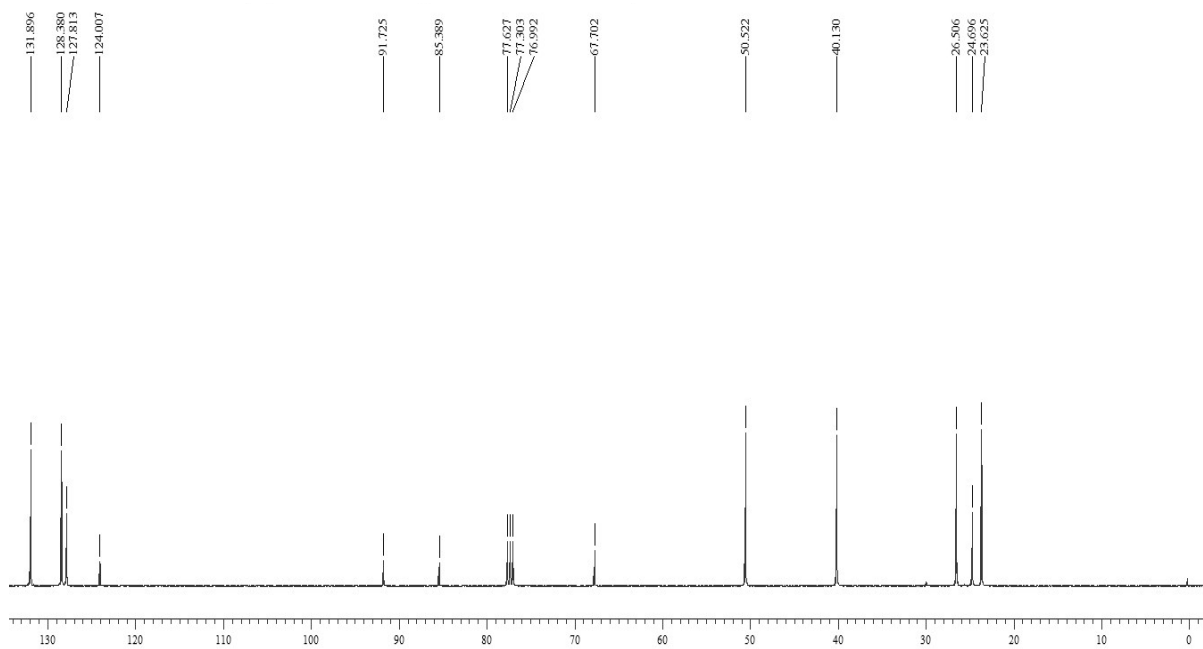

# <sup>1</sup>H & <sup>13</sup>C NMR spectrum of 9b

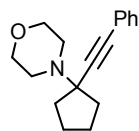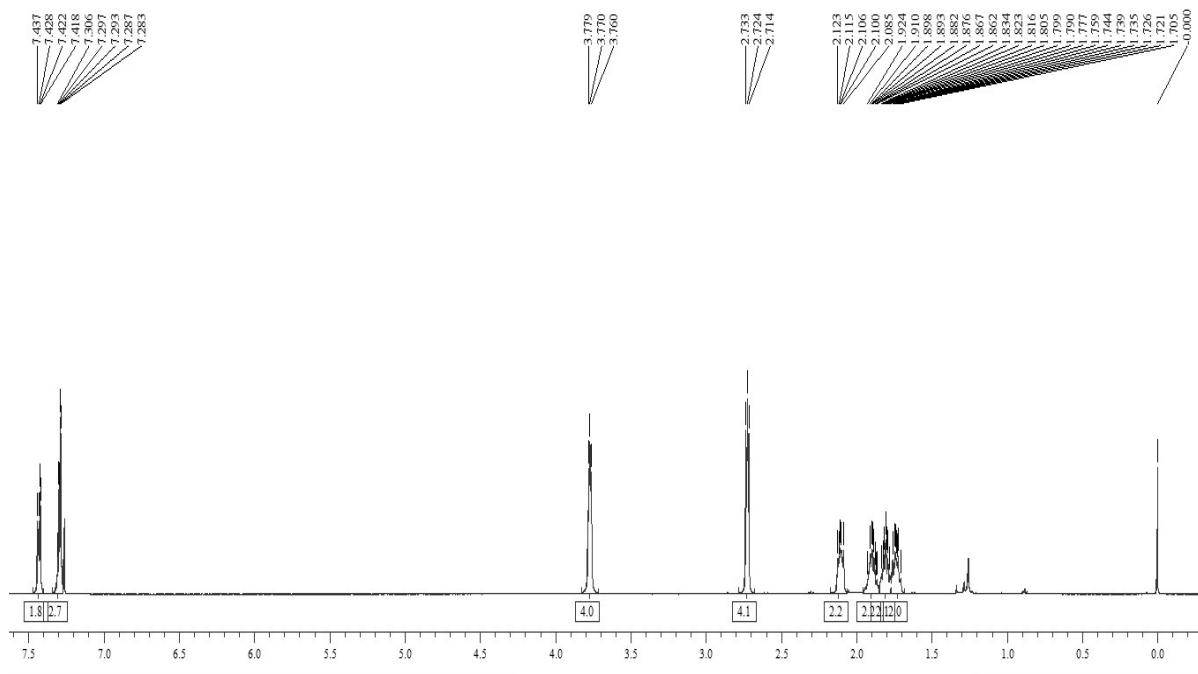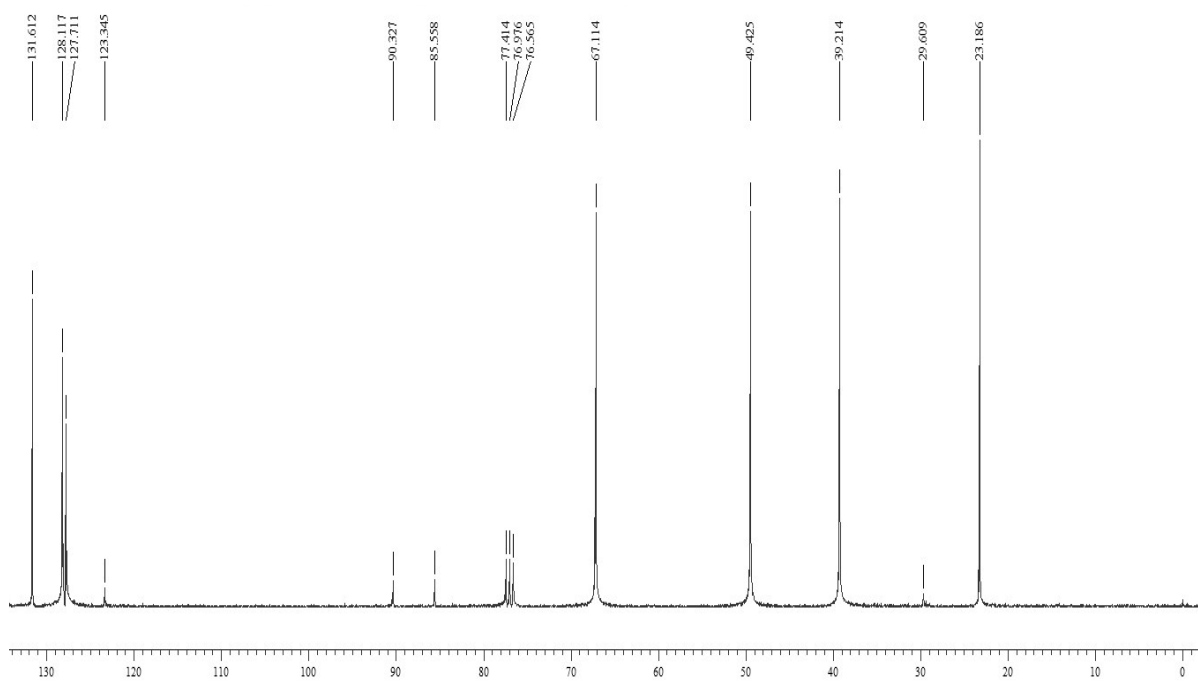



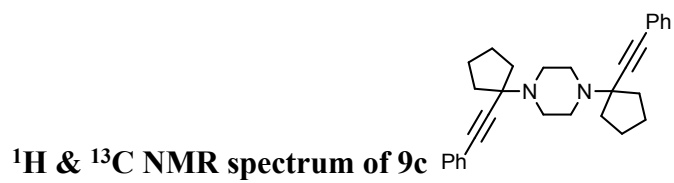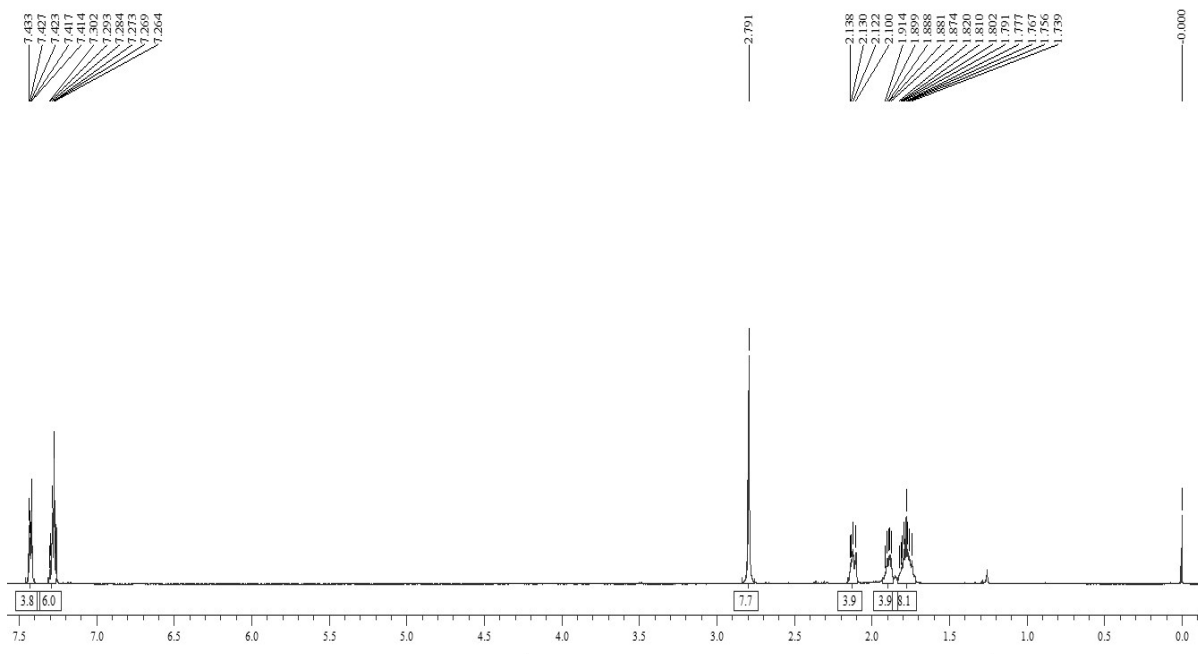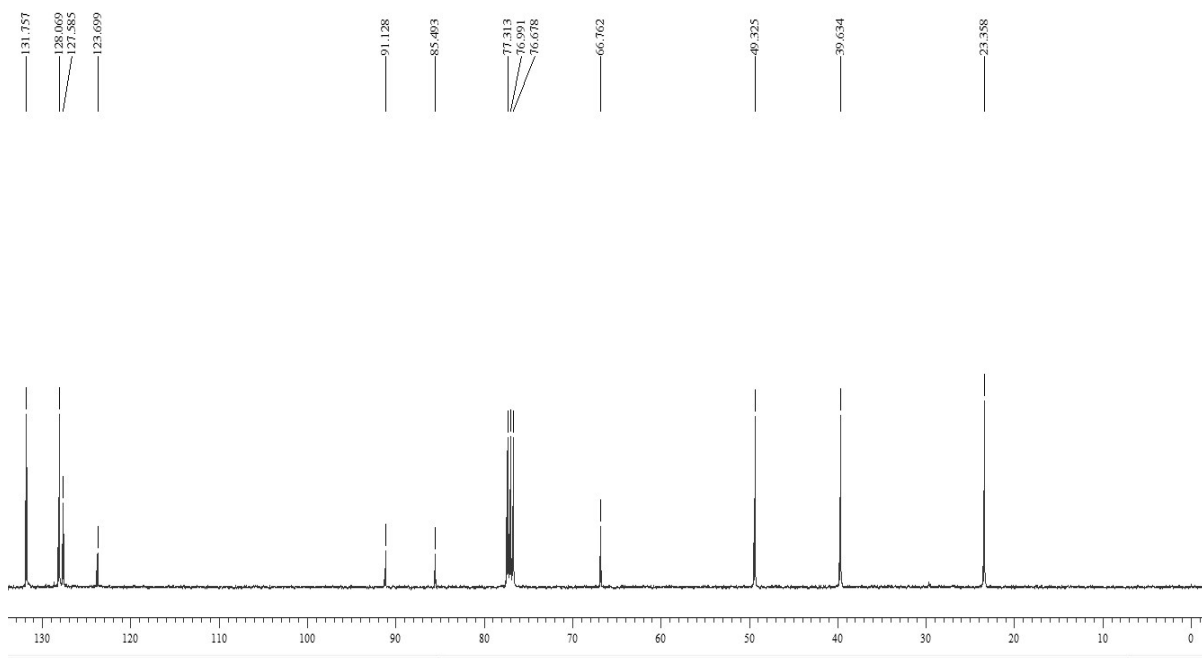

# $^1\text{H}$ & $^{13}\text{C}$ NMR spectrum of 9d

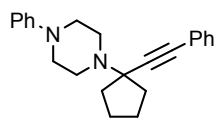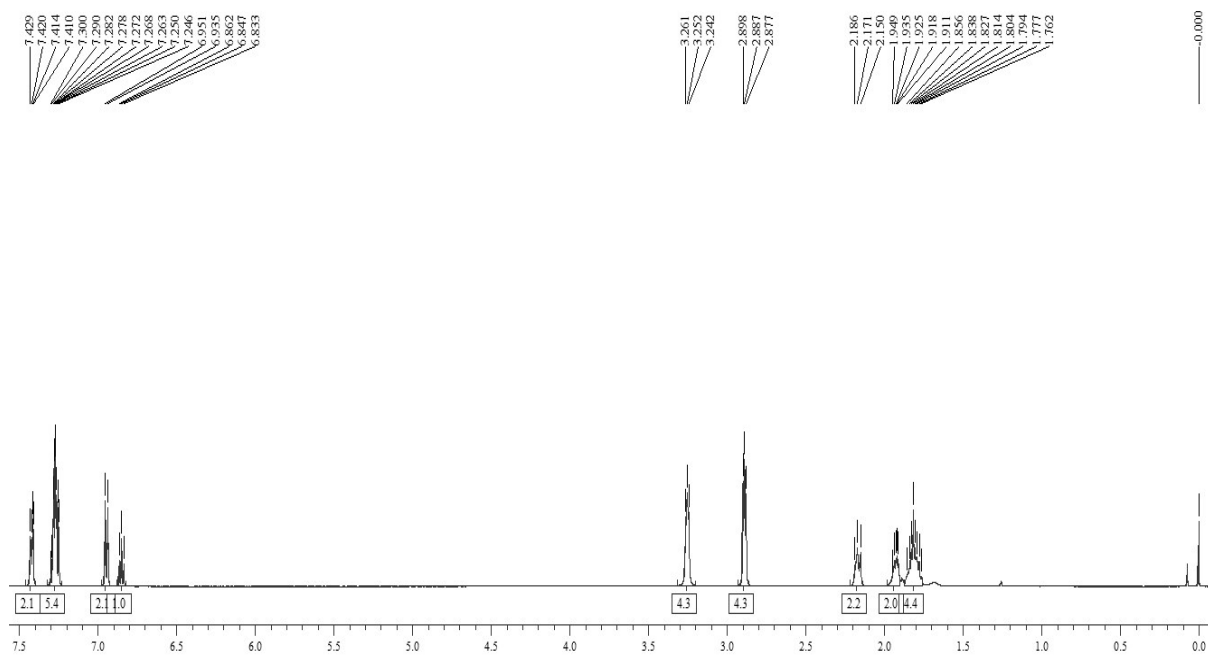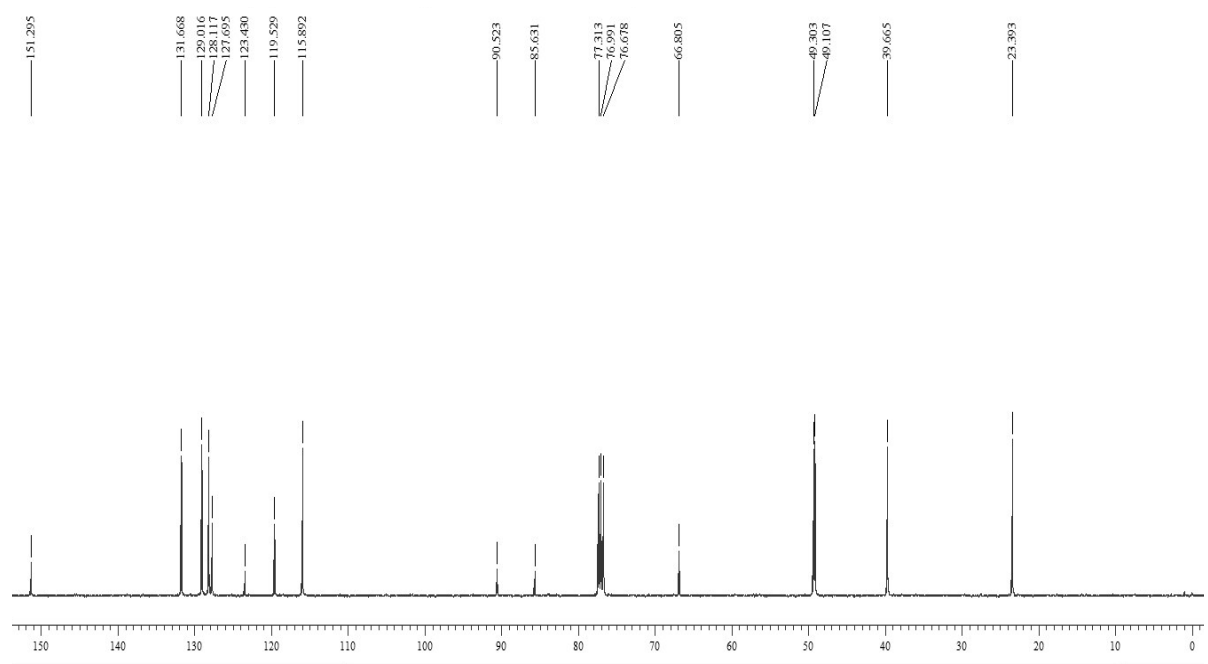

# $^1\text{H}$ & $^{13}\text{C}$ NMR spectrum of 9e

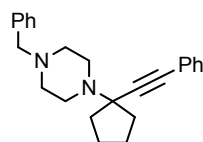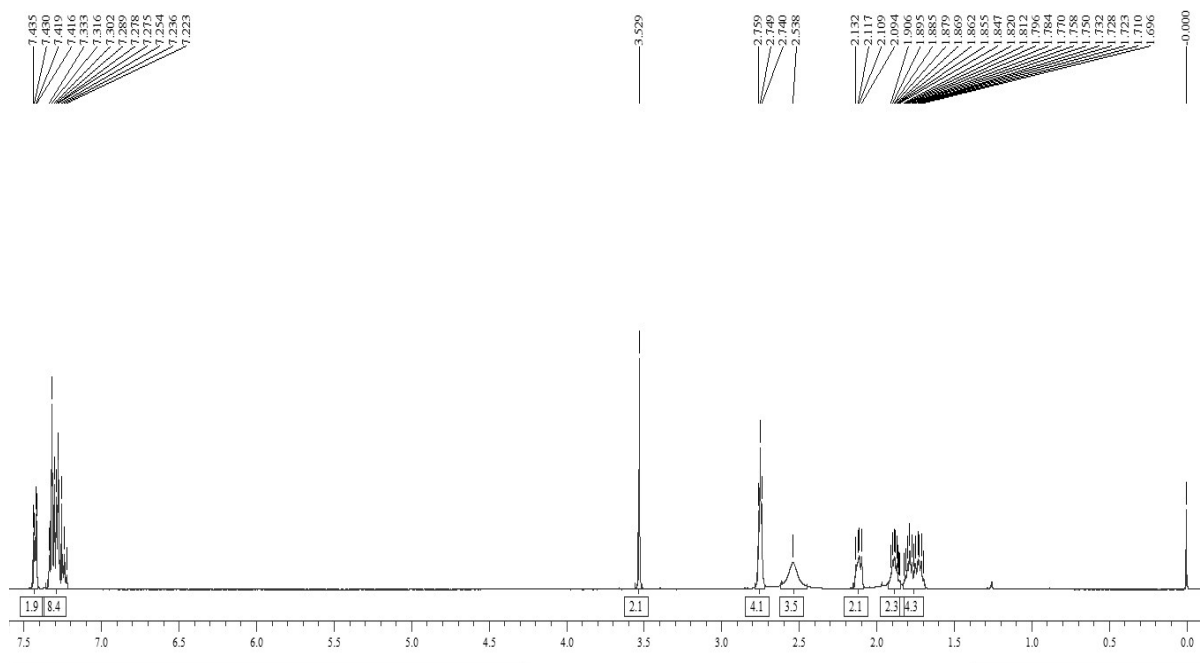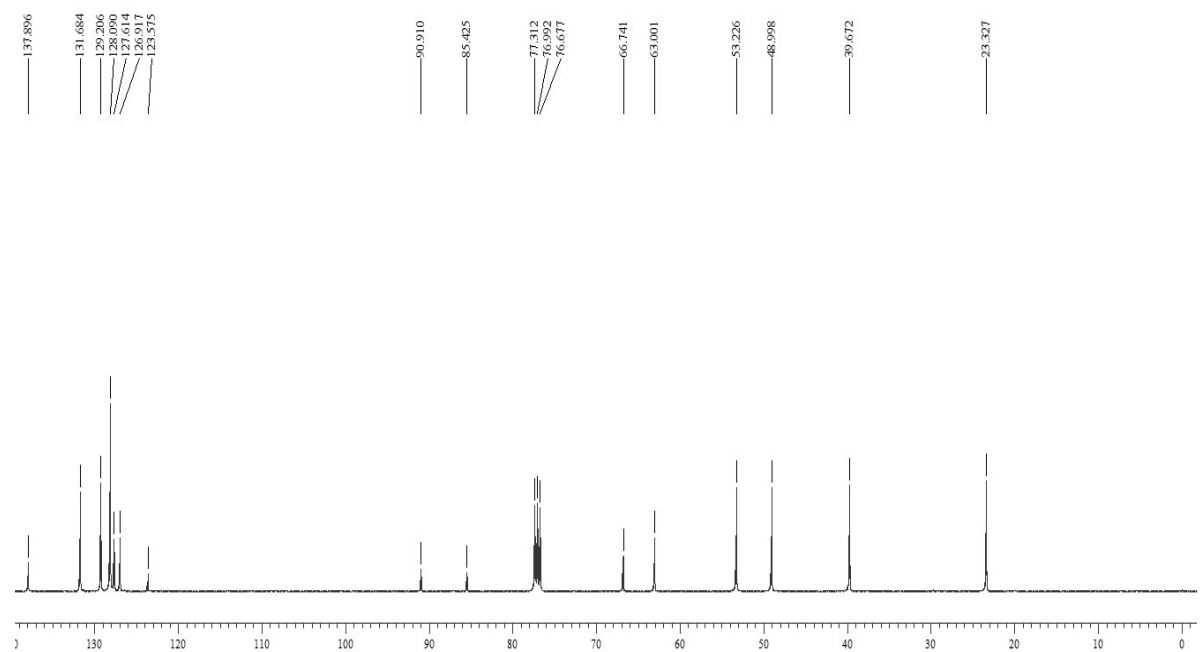

<sup>1</sup>H & <sup>13</sup>C NMR spectrum of 9f

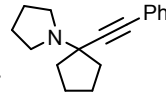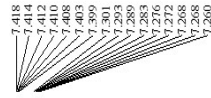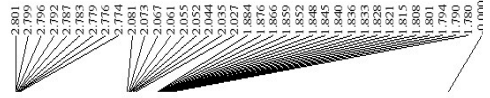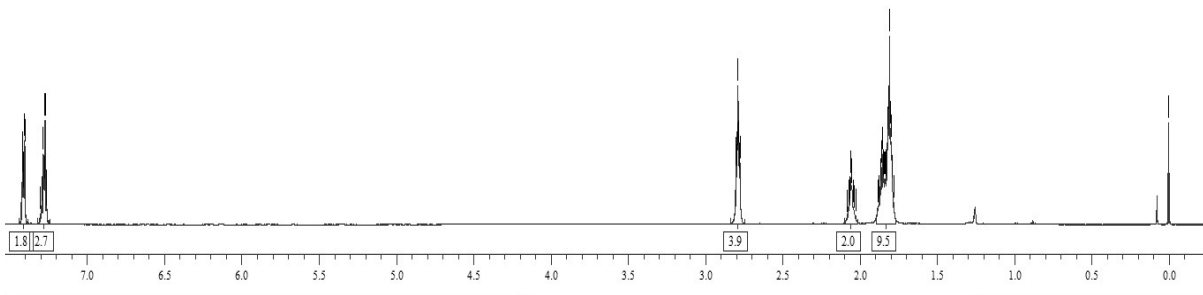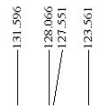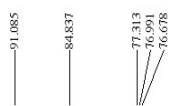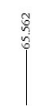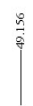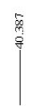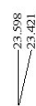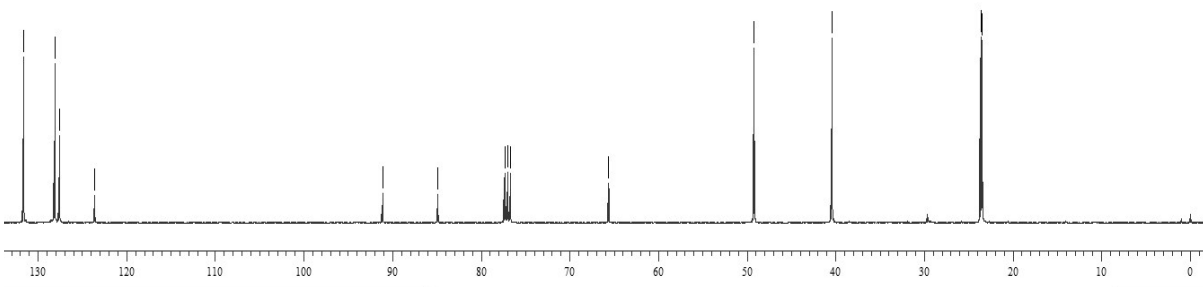

<sup>1</sup>H & <sup>13</sup>C NMR spectrum of 9g

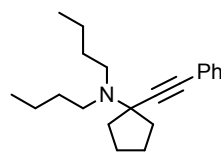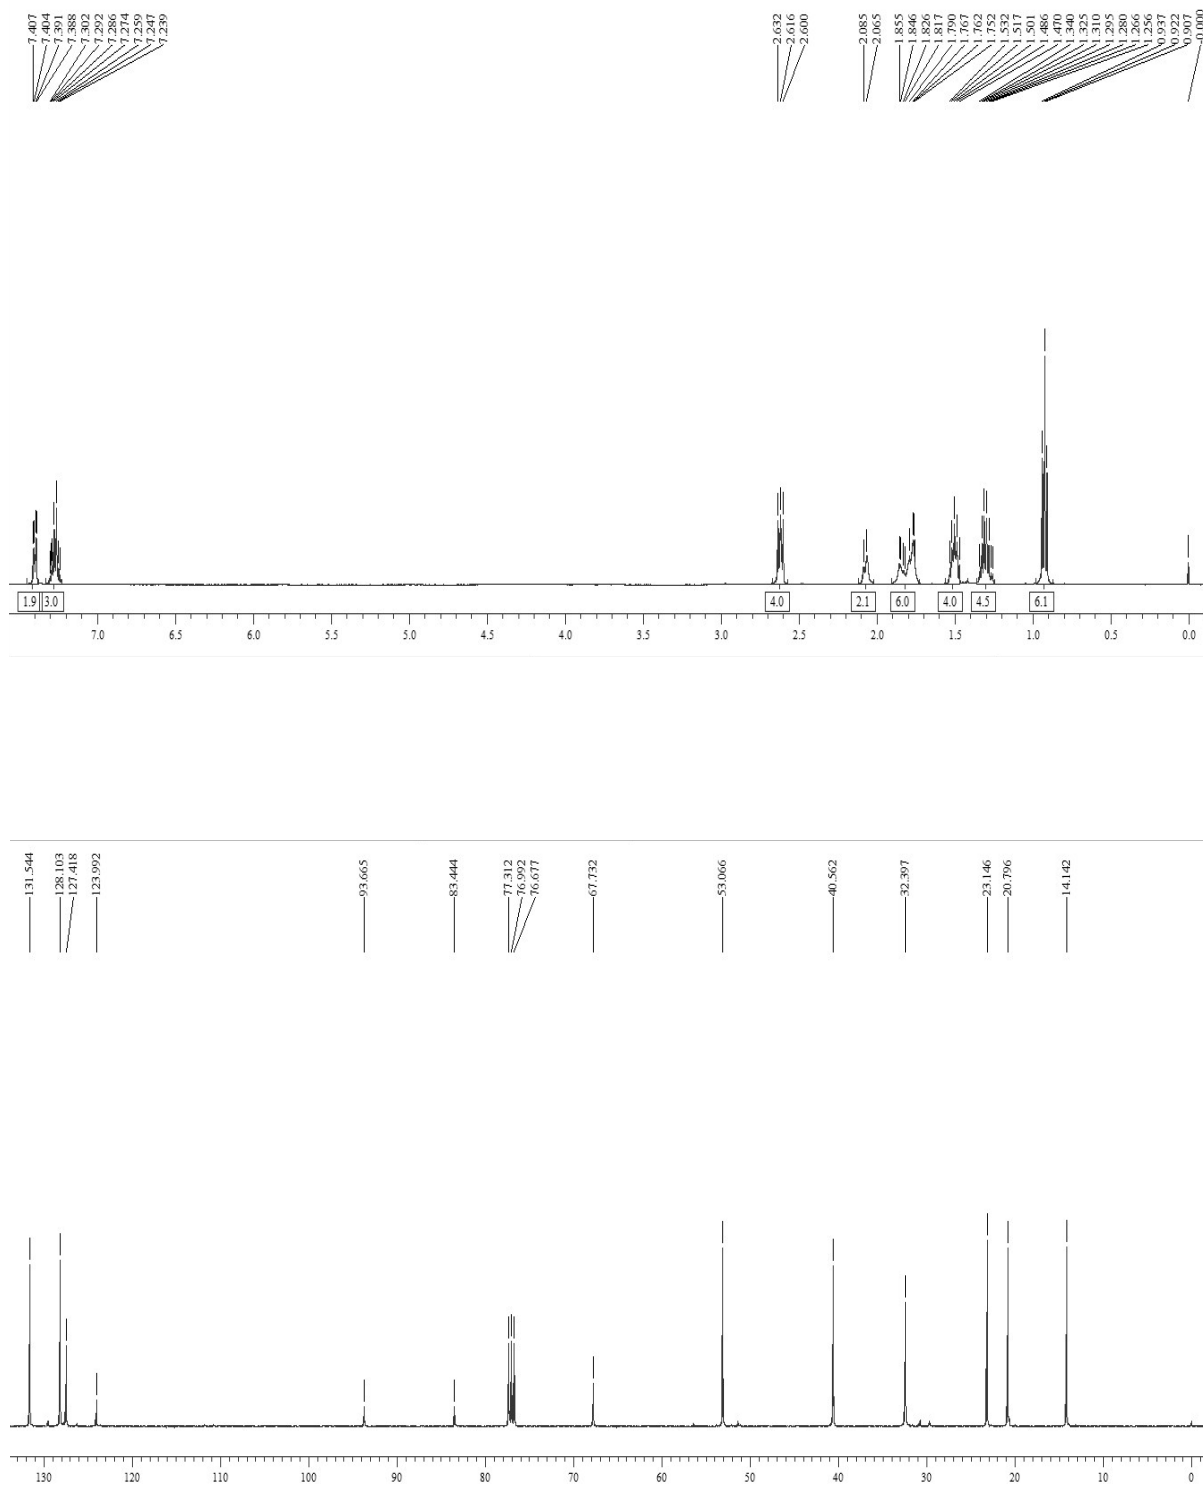

Supplement: c5nj03272e1.pdf [file c5nj03272e1.pdf]
